# Supplementary material for: Phenolic and Antioxidant Characterization of Fruit By-Products for Their Nutraceuticals and Dietary Supplements Valorization under a Circular Bio-Economy Approach
Source: MDPI journal article supplement (doi:10.3390/antiox13050604), 2024-05-14

## Phenolic and Antioxidant Characterization of Fruit By-Products for their Valorization as Nutraceuticals and Dietary Supplements under a Circular Bio-Economy Approach

**Figure S1.** Apricot samples from juice processing, including the by-product (ByP) known as apricot pomace and the final product (FinalP).

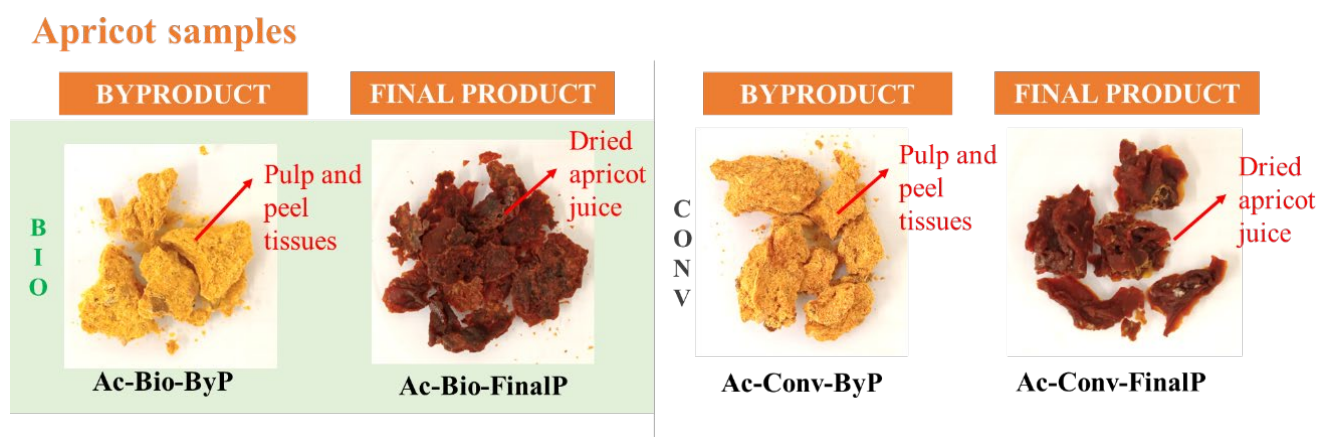

**Figure S2.** Peach samples from juice processing, including the by-product (ByP) known as peach pomace and the final product (FinalP).

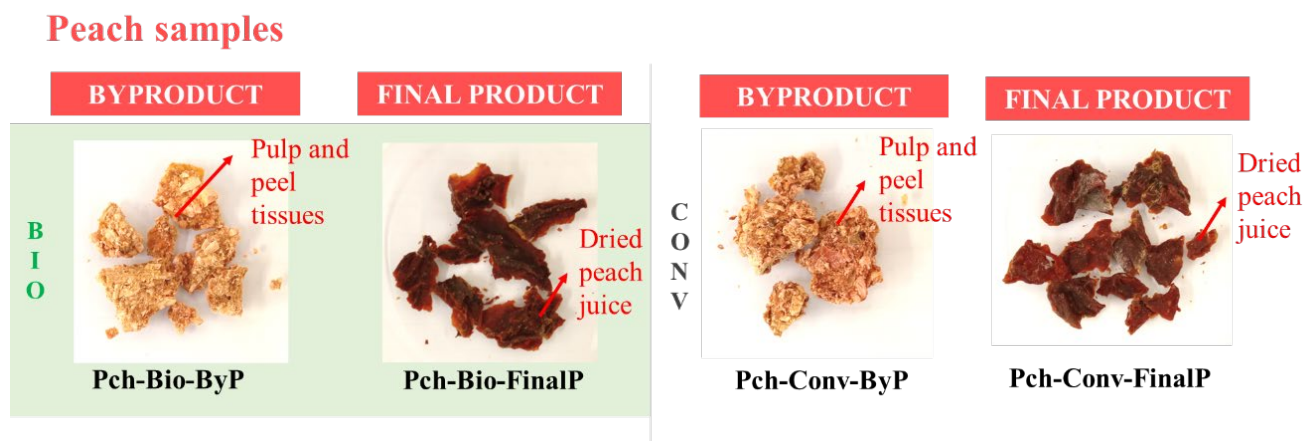

**Figure S3.** Apple samples from apple juice processing, including the by-product (ByP) known as apple pomace and the final product (FinalP).

## Apple samples

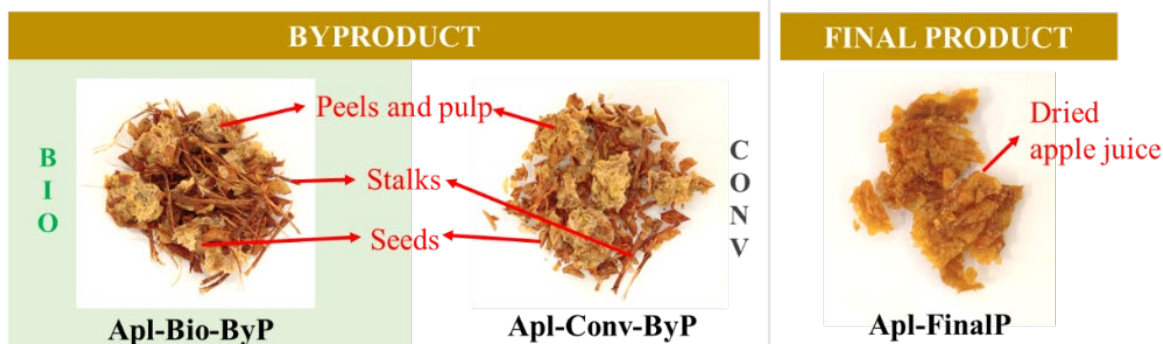

**Figure S4.** Tomato samples from tomato sauce processing, including the by-product (ByP) and the final product (FinalP).

## Tomato samples

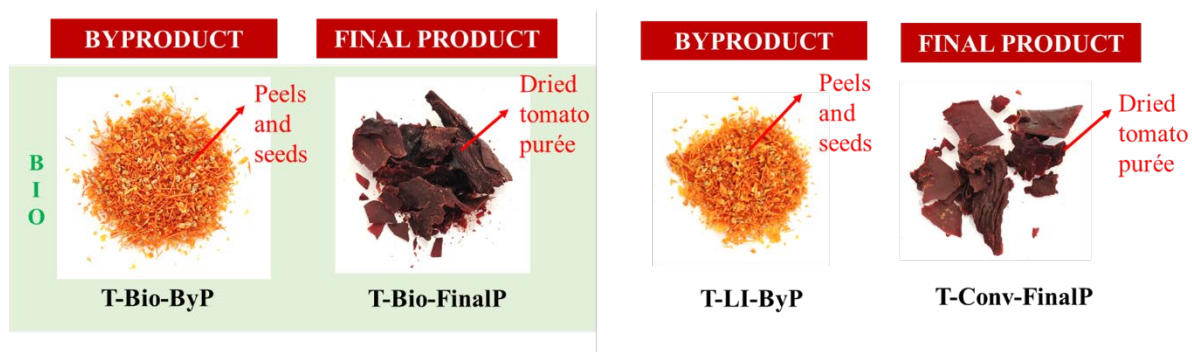

**Table S1.** Gravimetric determination, total phenolic content, total antioxidant status (measured with the ABTS assay), and protein content of agri-food samples.

| Samples analyzed | Gravimetric Determination | Total Phenolic Content              | Total Antioxidant Status               | Kjeldahl method: protein                 |
|------------------|---------------------------|-------------------------------------|----------------------------------------|------------------------------------------|
|                  |                           | (TPC)                               | (TAS)                                  | content                                  |
|                  | Yield (%) $\pm$ SD        | Average mmol GAE 100g <sup>-1</sup> | Average mmol Trolox 100g <sup>-1</sup> |                                          |
|                  | (n=3)                     | DW $\pm$ SD<br>(n=3)                | <sup>1</sup> DW $\pm$ SD<br>(n=3)      | Average g 100g <sup>-1</sup> DW $\pm$ SD |
| Ac-Bio-ByP       | 49.8 $\pm$ 7.29E-01       | 5.14 $\pm$ 1.71E-01                 | 5.04 $\pm$ 5.58E-01                    | 7.40 $\pm$ 1.30E+00                      |
| Ac-Conv-ByP      | 52.6 $\pm$ 4.23E+00       | 5.42 $\pm$ 3.22E-01                 | 6.12 $\pm$ 1.26E+00                    | 6.40 $\pm$ 1.20E+00                      |
| Ac-Bio-FinalP    | 78.0 $\pm$ 2.53E+00       | 5.73 $\pm$ 1.18E+00                 | 7.51 $\pm$ 9.60E-01                    | 5.30 $\pm$ 9.50E-01                      |
| Ac-Conv-FinalP   | 64.3 $\pm$ 1.42E-01       | 5.52 $\pm$ 1.34E+00                 | 8.51 $\pm$ 1.14E+00                    | 15.70 $\pm$ 2.80E+00                     |
| Pch-Bio-ByP      | 50.7 $\pm$ 3.57E+00       | 6.06 $\pm$ 4.71E-01                 | 6.73 $\pm$ 1.05E+00                    | 5.70 $\pm$ 1.00E+00                      |
| Pch-Conv-ByP     | 27.0 $\pm$ 4.58E-02       | 4.99 $\pm$ 1.58E-01                 | 6.88 $\pm$ 1.69E+00                    | 6.90 $\pm$ 1.20E+00                      |
| Pch-Bio-FinalP   | 54.1 $\pm$ 2.31E-01       | 7.87 $\pm$ 1.05E+00                 | 10.57 $\pm$ 1.17E+00                   | 11.20 $\pm$ 2.00E+00                     |
| Pch-Conv-FinalP  | 50.7 $\pm$ 1.59E-01       | 7.56 $\pm$ 5.09E-01                 | 8.66 $\pm$ 1.93E+00                    | 15.80 $\pm$ 2.80E+00                     |
| Apl-Bio-ByP      | 47.7 $\pm$ 4.65E+00       | 4.68 $\pm$ 3.34E-01                 | 7.06 $\pm$ 7.96E-01                    | 4.70 $\pm$ 8.50E-01                      |

|               |               |               |               |                |
|---------------|---------------|---------------|---------------|----------------|
| Apl-Conv-ByP  | 51.8±4.81E+00 | 4.25±4.97E-01 | 4.95±5.69E-01 | 4.10±7.40E-01  |
| Apl-FinalP    | 87.5±3.24E-01 | 7.38±1.04E+00 | 5.98±1.10E+00 | 2.20±4.00E-01  |
| T-Bio-ByP     | 20.7±9.08E-01 | 1.42±5.98E-01 | 2.27±3.65E-01 | 14.40±2.60E+00 |
| T-LI-ByP      | 16.3±2.18E+00 | 1.99±9.35E-02 | 2.53±3.69E-01 | 11.00±2.00E+00 |
| T-Bio-FinalP  | 78.6±2.96E+00 | 5.35±2.95E-01 | 4.21±1.66E+00 | 9.90±1.80E+00  |
| T-Conv-FinalP | 82.1±2.55E+00 | 6.27±8.81E-01 | 2.94±7.71E-01 | 12.30±2.20E+00 |

## HPLC-DAD analysis

**Table S2.** Polyphenol standards used for method optimization and validation.

| Nº | Compound            | $\lambda_{\max}$<br>(nm) | Retention<br>Time (min) | Picomoles mL <sup>-1</sup> | Phenolic subclass    | Structure                                                                             |
|----|---------------------|--------------------------|-------------------------|----------------------------|----------------------|---------------------------------------------------------------------------------------|
| 1  | Gallic Acid         | 280                      | 3.685                   | 1.65E+08                   | Hydroxybenzoic acid  | 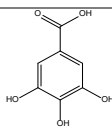   |
| 2  | Protocatechuic acid | 250                      | 6.175                   | 7.30E+07                   | Hydroxybenzoic acid  |   |
| 3  | (+)-Catechin        | 280                      | 9.324                   | 2.26E+08                   | Flavan-3-ol          |  |
| 4  | Chlorogenic acid    | 320                      | 10.597                  | 2.65E+07                   | Hydroxycinnamic acid |   |
| 5  | Caffeic acid        | 320                      | 11.522                  | 2.08E+07                   | Hydroxycinnamic acid |  |
| 6  | (-)-Epicatechin     | 280                      | 12.204                  | 9.69E+07                   | Flavan-3-ol          |  |
| 7  | p-coumaric acid     | 320                      | 14.982                  | 1.14E+07                   | Hydroxycinnamic acid |  |

|    |                      |     |        |          |                      |                                                                                       |
|----|----------------------|-----|--------|----------|----------------------|---------------------------------------------------------------------------------------|
| 8  | Ferulic acid         | 320 | 16.484 | 2.90E+07 | Hydroxycinnamic acid | 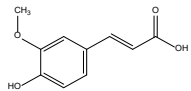   |
| 9  | Hyperoside           | 250 | 24.975 | 8.07E+07 | Flavonol             |    |
| 10 | Isoquercitrin        | 250 | 25.828 | 8.07E+07 | Flavonol             |    |
| 11 | (+)-Rutin Trihydrate | 250 | 26.301 | 3.07E+07 | Flavonol             |    |
| 12 | Phloridzin dihydrate | 280 | 27.814 | 5.95E+07 | Dihydrochalcone      |   |
| 13 | Trans-cinnamic acid  | 280 | 32.306 | 5.06E+07 | Hydroxycinnamic acid |  |
| 14 | Quercitrin           | 250 | 32.934 | 1.25E+08 | Flavonol             |  |
| 15 | Myricetin            | 370 | 33.915 | 6.22E+07 | Flavonol             |  |
| 16 | Daidzein             | 250 | 37.583 | 6.69E+07 | Isoflavone           |  |
| 17 | Naringenin           | 280 | 44.200 | 2.75E+07 | Flavanone            |  |

|    |                     |     |        |          |            |                                                                                     |
|----|---------------------|-----|--------|----------|------------|-------------------------------------------------------------------------------------|
| 18 | Genistein           | 250 | 50.684 | 5.40E+07 | Isoflavone | 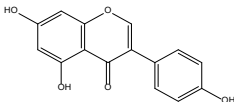 |
| 19 | Hesperetin          | 280 | 50.702 | 9.33E+07 | Flavanone  |  |
| 20 | Naringenin chalcone | 370 | 57.585 | 6.06E+07 | Chalcone   |  |
| 21 | Kaempferol          | 370 | 60.822 | 4.19E+07 | Flavonol   |  |
| 22 | Apigenin            | 320 | 65.028 | 13.200   | Flavone    |  |

**Table S3.** Standard concentration in the mixture whose chromatogram is reported in Figure 6.

| Standard | Compound             | Concentration         |
|----------|----------------------|-----------------------|
|          |                      | $\mu\text{g mL}^{-1}$ |
| 1        | Gallic Acid          | 28.125                |
| 2        | Protocatechuic acid  | 11.250                |
| 3        | (+)-Catechin         | 65.500                |
| 4        | Chlorogenic acid     | 9.375                 |
| 5        | Caffeic acid         | 3.750                 |
| 6        | (-)-Epicatechin      | 28.125                |
| 7        | P-coumaric acid      | 1.875                 |
| 8        | Ferulic acid         | 5.625                 |
| 9        | Hyperoside           | 37.500                |
| 10       | Isoquercitrin        | 37.500                |
| 11       | (+)-Rutin Trihydrate | 18.750                |
| 12       | Phloridzin dihydrate | 28.125                |
| 13       | Trans-cinnamic acid  | 7.500                 |
| 14       | Quercitrin           | 56.250                |
| 15       | Myricetin            | 19.800                |
| 16       | Daidzein             | 17.000                |
| 17       | Naringenin           | 7.500                 |
| 18       | Genistein            | 14.580                |
| 19       | Hesperetin           | 28.200                |
| 20       | Naringenin chalcone  | 16.500                |
| 21       | Kaempferol           | 12.000                |
| 22       | Apigenin             | 13.200                |

**Table S4.** Data concerning calibration curves of polyphenols standards, including LoD and LoQ values.

| Std | Compound             | λ (nm) | rt<br>(min) | Linear Range<br>μg mL <sup>-1</sup> | Calibration Curves   | R <sup>2</sup> | LoD<br>(μg mL <sup>-1</sup> ) | LOQ   |
|-----|----------------------|--------|-------------|-------------------------------------|----------------------|----------------|-------------------------------|-------|
| 1   | Gallic Acid          | 280    | 3.685       | 31.60-240.00                        | y = 71.466x + 198.82 | 0.9994         | 10.40                         | 31.60 |
| 2   | Protocatechuic acid  | 250    | 6.175       | 7.00-100.00                         | y = 44.709x + 49.354 | 0.9998         | 2.30                          | 7.00  |
| 3   | (+)-Catechin         | 280    | 9.324       | 19.40-240.00                        | y = 19.454x + 52.856 | 0.9998         | 6.40                          | 19.40 |
| 4   | Chlorogenic acid     | 320    | 10.597      | 49.90-300.00                        | y = 84.437x + 353.85 | 0.9999         | 16.50                         | 49.90 |
| 5   | Caffeic acid         | 320    | 11.522      | 3.60-60.00                          | y = 127.5x + 74.584  | 0.9999         | 1.20                          | 3.60  |
| 6   | (-)-Epicatechin      | 280    | 12.204      | 10.70-128.00                        | y = 14.039x + 21.127 | 0.9997         | 3.50                          | 10.70 |
| 7   | P-coumaric acid      | 320    | 14.982      | 0.60-10.00                          | y = 241.61x + 23.811 | 0.9999         | 0.20                          | 0.60  |
| 8   | Ferulic acid         | 320    | 16.484      | 2.60-32.00                          | y = 99.2x + 35.838   | 0.9998         | 0.90                          | 2.60  |
| 9   | Hyperoside           | 250    | 24.975      | 7.30-150.00                         | Y=49.26x + 44.529    | 0.9999         | 2.40                          | 7.30  |
| 10  | Isoquercitrin        | 250    | 25.828      | 2.80-40.00                          | y = 49.507x + 17.742 | 0.9998         | 0.90                          | 2.80  |
| 11  | (+)-Rutin Trihydrate | 250    | 26.301      | 5.00-64.00                          | y = 37.121x + 13.267 | 0.9998         | 1.70                          | 5.00  |
| 12  | Phloridzin dihydrate | 280    | 27.814      | 7.30-96.00                          | y = 41.09x + 44.011  | 0.9998         | 2.40                          | 7.30  |
| 13  | Trans-cinnamic acid  | 280    | 32.306      | 1.50-24.00                          | y = 156.96x + 30.134 | 0.9998         | 0.50                          | 1.50  |
| 14  | Quercitrin           | 250    | 32.934      | 13.30-256.00                        | y = 31.202x + 64.347 | 0.9999         | 4.40                          | 13.30 |
| 15  | Myricetin            | 370    | 33.915      | 7.50-128.00                         | y = 118.7x - 39.818  | 0.9999         | 2.50                          | 7.50  |

|    |                     |     |        |              |                      |        |      |       |
|----|---------------------|-----|--------|--------------|----------------------|--------|------|-------|
| 16 | Daidzein            | 250 | 37.583 | 8.50-160.00  | y = 111.22x + 142.73 | 0.9999 | 2.80 | 8.50  |
| 17 | Naringenin          | 280 | 44.200 | 5.20-64.00   | y = 64.552x + 39.8   | 0.9998 | 1.70 | 5.20  |
| 18 | Genistein           | 250 | 50.684 | 7.70-96.00   | y = 160.73x + 172.32 | 0.9998 | 2.50 | 7.70  |
| 19 | Hesperetin          | 280 | 50.702 | 12.60-160.00 | y = 114.62x + 213.99 | 0.9998 | 4.20 | 12.60 |
| 20 | Naringenin chalcone | 370 | 57.585 | 8.10-96.00   | y = 125.18x + 120.48 | 0.9997 | 2.70 | 8.10  |
| 21 | Kaempferol          | 370 | 60.822 | 5.30-96.00   | y = 193.95x + 70.837 | 0.9999 | 1.70 | 5.30  |
| 22 | Apigenin            | 320 | 65.028 | 6.70-96.00   | y = 112.74x + 66.409 | 0.9998 | 2.20 | 6.70  |

Std: standard; rt: retention time.

**Table S5.** inter-day variation of polyphenol standards.

| Std | Compound             | Concentration<br>µg mL <sup>-1</sup> | Day 1 ±SD n=2       | Day 2 ±SD n=2       | Day 3 ±SD n=2       | Average of Areas ±SD<br>n=6 | RSD% |
|-----|----------------------|--------------------------------------|---------------------|---------------------|---------------------|-----------------------------|------|
| 1   | Gallic acid          | 120                                  | 8749.600±2.022E+01  | 8770.900±8.771E+03  | 8877.750±1.768E+00  | 8799.417±6.8670E+01         | 0.78 |
| 2   | Protocatechuic acid  | 50                                   | 2299.750±1.520E+01  | 2336.500±6.081E+00  | 2383.950±5.586E+00  | 2340.067±4.2213E+01         | 1.80 |
| 3   | (+)-Catechin         | 120                                  | 2540.800±5.233E+00  | 2566.450±9.192E-01  | 2584.700±1.980E+00  | 2563.983±2.2054E+01         | 0.86 |
| 4   | Chlorogenic acid     | 150                                  | 10681.000±1.273E+01 | 10687.000±1.414E+01 | 10800.500±1.202E+01 | 10722.833±6.7328E+01        | 0.63 |
| 5   | Caffeic acid         | 30                                   | 3792.800±5.233E+00  | 3915.350±1.690E+01  | 4068.600±7.071E+00  | 3925.583±1.3818E+02         | 3.52 |
| 6   | (-)-Epicatechin      | 64                                   | 986.350±1.216E+00   | 994.080±1.004E+00   | 1001.700±1.556E+00  | 994.043±7.6751E+00          | 0.77 |
| 7   | p-coumaric acid      | 5                                    | 1091.650±1.485E+00  | 1125.650±4.738E+00  | 1172.500±5.233E+00  | 1129.933±4.0595E+01         | 3.59 |
| 8   | Ferulic acid         | 16                                   | 1583.900±1.414E-01  | 1591.300±5.657E-01  | 1605.300±2.404E+00  | 1593.500±1.0868E+01         | 0.68 |
| 9   | Hyperoside           | 32                                   | 3769.550±2.072E+01  | 3868.150±1.237E+01  | 4023.700±1.442E+01  | 3887.133±1.2813E+02         | 3.30 |
| 10  | Isoquercitrin        | 20                                   | 970.415±1.973E+00   | 974.000±2.404E+00   | 983.190±3.437E+00   | 975.868±6.5892E+00          | 0.68 |
| 11  | (+)-Rutin Trihydrate | 75                                   | 1200.200±9.192E+00  | 1228.400±1.556E+00  | 1236.450±2.044E+01  | 1221.683±1.9036E+01         | 1.56 |
| 12  | Phloridzin dihydrate | 48                                   | 2127.250±1.025E+01  | 2154.050±3.465E+00  | 2192.750±4.313E+00  | 2158.017±3.2930E+01         | 1.53 |
| 13  | Trans-cinnamic acid  | 12                                   | 1895.150±2.758E+00  | 1904.300±5.657E-01  | 1925.250±1.061E+00  | 1908.233±1.5431E+01         | 0.81 |
| 14  | Quercitrin           | 128                                  | 3866.200±3.111E+00  | 3993.500±1.202E+01  | 4156.050±1.421E+01  | 4005.250±1.4528E+02         | 3.63 |
| 15  | Myricetin            | 64                                   | 7852.050±3.316E+01  | 7901.650±4.525E+00  | 7995.650±9.405E+00  | 7916.450±7.2935E+01         | 0.92 |
| 16  | Daidzein             | 80                                   | 32849.500±4.738E+01 | 32660.000±2.121E+01 | 32715.500±5.162E+01 | 32741.667±9.7422E+01        | 0.30 |
| 17  | Naringenin           | 32                                   | 2118.750±4.830E+01  | 2080.700±2.828E-01  | 2103.000±1.414E+01  | 2100.817±1.9119E+01         | 0.91 |
| 18  | Genistein            | 48                                   | 7557.650±7.071E-02  | 7787.400±1.966E+01  | 8103.000±3.154E+01  | 7816.017±2.7380E+02         | 3.50 |
| 19  | Hesperetin           | 80                                   | 9721.650±1.153E+01  | 9865.300±4.525E+00  | 10028.500±1.626E+01 | 9871.817±1.5353E+02         | 1.56 |
| 20  | Naringenin chalcone  | 48                                   | 14759.500±2.051E+01 | 14712.500±1.626E+01 | 14685.500±7.071E-01 | 14719.167±6.8670E+01        | 0.25 |
| 21  | Kaempferol           | 48                                   | 18385.000±4.243E+01 | 18365.500±2.616E+01 | 18396.500±2.051E+01 | 18382.333±4.2213E+01        | 0.09 |
| 22  | Apigenin             | 48                                   | 12293.000±3.536E+01 | 12324.000±7.071E+00 | 12331.500±2.616E+01 | 12316.167±2.2054E+01        | 0.17 |

Std: standard.

**Table S6.** Intra-day variation of polyphenol standards.

| Std | Compound             | Concentration       | Area 1 ±SD         | Area 2 ±SD         | Area 3 ±SD         | Average of Areas ±SD | RSD% |
|-----|----------------------|---------------------|--------------------|--------------------|--------------------|----------------------|------|
|     |                      | µg mL <sup>-1</sup> | n=2                | n=2                | n=2                | n=6                  |      |
| 1   | Gallic acid          | 120                 | 8892.8±4.09E+01    | 8982.250±1.28E+02  | 9046.850±8.59E+01  | 8973.967±7.74E+01    | 0.86 |
| 2   | Protocatechuic acid  | 50                  | 2341.800±3.39E+00  | 2372.150±2.69E+01  | 2382.800±2.88E+01  | 2365.583±2.13E+01    | 0.90 |
| 3   | (+)-Catechin         | 120                 | 2660.450±7.97E+01  | 2773.100±1.03E+02  | 2820.950±1.10E+02  | 2751.500±8.24E+01    | 2.99 |
| 4   | Chlorogenic acid     | 150                 | 10846.000±1.20E+01 | 10947.500±7.00E+01 | 11004.500±1.03E+02 | 10932.667±8.03E+01   | 0.73 |
| 5   | Caffeic acid         | 30                  | 3889.550±5.16E+00  | 3947.250±2.30E+01  | 3956.350±2.45E+01  | 3931.050±3.62E+01    | 0.92 |
| 6   | (-)-Epicatechin      | 64                  | 1033.600±3.82E+00  | 1075.700±3.97E+01  | 1093.750±4.31E+01  | 1067.683±3.09E+01    | 2.89 |
| 7   | p-coumaric acid      | 5                   | 1119.300±1.70E+00  | 1137.150±6.15E+00  | 1138.850±7.42E+00  | 1131.767±1.08E+01    | 0.96 |
| 8   | Ferulic acid         | 16                  | 1657.900±3.11E+00  | 1726.650±6.46E+01  | 1754.800±6.99E+01  | 1713.117±4.98E+01    | 2.91 |
| 9   | Hyperoside           | 32                  | 3854.450±9.97E+00  | 3900.450±1.34E+01  | 3900.750±2.24E+01  | 3885.217±2.66E+01    | 0.69 |
| 10  | Isoquercitrin        | 20                  | 991.735±2.88E+00   | 998.445±5.87E-01   | 995.775±4.28E+00   | 995.318±3.38E+00     | 0.34 |
| 11  | (+)-Rutin Trihydrate | 75                  | 1214.800±2.01E+01  | 1215.900±1.56E+01  | 1233.100±3.41E+01  | 1221.267±1.03E+01    | 0.84 |
| 12  | Phloridzin dihydrate | 48                  | 2159.450±1.91E+00  | 2185.950±2.50E+01  | 2196.700±2.86E+01  | 2180.700±1.92E+01    | 0.88 |
| 13  | Trans-cinnamic acid  | 12                  | 1929.350±4.88E+00  | 1951.500±1.20E+01  | 1955.800±1.67E+01  | 1945.550±1.42E+01    | 0.73 |
| 14  | Quercitrin           | 128                 | 3977.650±7.14E+00  | 4032.650±1.85E+01  | 4033.200±2.57E+01  | 4014.500±3.19E+01    | 0.79 |
| 15  | Myricetin            | 64                  | 7676.300±4.67E+00  | 7651.850±5.95E+01  | 7709.900±4.98E+01  | 7679.350±2.91E+01    | 0.38 |
| 16  | Daidzein             | 80                  | 33093.500±2.98E+02 | 33054.500±5.37E+02 | 33116.000±6.18E+02 | 33088.000±3.11E+01   | 0.09 |
| 17  | Naringenin           | 32                  | 2287.850±7.07E-02  | 2301.250±1.90E+01  | 2283.350±7.45E+01  | 2290.817±9.31E+00    | 0.41 |
| 18  | Genistein            | 48                  | 9083.350±1.05E+03  | 8975.550±1.20E+03  | 8953.250±1.23E+03  | 9004.050±6.96E+01    | 0.77 |
| 19  | Hesperetin           | 80                  | 9801.900±2.15E+02  | 9627.500±1.22E+02  | 9673.050±2.76E+02  | 9700.817±9.05E+01    | 0.93 |
| 20  | Naringenin chalcone  | 48                  | 14718.000±3.82E+01 | 14724.500±7.07E-01 | 14729.500±6.15E+01 | 14724.000±5.77E+00   | 0.04 |
| 21  | Kaempferol           | 48                  | 18548.500±2.74E+02 | 18579.000±3.28E+02 | 18613.500±3.27E+02 | 18580.333±3.25E+01   | 0.18 |
| 22  | Apigenin             | 48                  | 12423.000±2.19E+02 | 12466.000±2.08E+02 | 12487.500±2.47E+02 | 12458.833±3.28E+01   | 0.26 |

**Table S7.** %Recovery of HPLC-DAD data.

| Standard | Compound            | Concentration       | % Recovery±SD   | RDS% |
|----------|---------------------|---------------------|-----------------|------|
|          |                     | µg mL <sup>-1</sup> | n= 2            |      |
| 1        | Gallic Acid         | 7.031               | 103.16±5.42E+00 | 2.20 |
| 2        | Protocatechuic acid | 2.813               | 91.71±7.73E+00  | 6.11 |



|    |                      |        |                 |      |
|----|----------------------|--------|-----------------|------|
| 3  | (+)-Catechin         | 15.625 | 92.81±1.20E+01  | 5.27 |
| 4  | Chlorogenic acid     | 2.344  | 92.47±4.94E+00  | 5.53 |
| 5  | Caffeic acid         | 0.938  | 91.72±1.21E+01  | 6.10 |
| 6  | (-)-Epicatechin      | 7.031  | 101.67±1.73E+00 | 1.17 |
| 7  | p-coumaric acid      | 0.469  | 104.44±1.23E+01 | 3.07 |
| 8  | Ferulic acid         | 1.406  | 100.36±9.06E-01 | 0.25 |
| 9  | Hyperoside           | 9.375  | 93.95±2.13E+00  | 4.41 |
| 10 | Isoquercitrin        | 9.375  | 97.94±5.80E+00  | 1.47 |
| 11 | (+)-Rutin Trihydrate | 4.688  | 100.48±1.87E+00 | 0.34 |
| 12 | Phloridzin dihydrate | 7.031  | 104.35±7.66E+00 | 3.01 |
| 13 | Trans-cinnamic acid  | 1.875  | 90.54±2.65E+01  | 7.02 |
| 14 | Quercitrin           | 14.063 | 95.50±1.23E+01  | 3.25 |
| 15 | Myricetin            | 4.950  | 101.29±5.95E+00 | 0.91 |
| 16 | Daidzein             | 4.250  | 99.63±1.81E+01  | 0.26 |
| 17 | Naringenin           | 1.875  | 99.72±6.42E-01  | 0.20 |
| 18 | Genistein            | 3.645  | 99.20±2.72E+01  | 0.57 |
| 19 | Hesperetin           | 7.050  | 99.75±5.46E+00  | 0.18 |
| 20 | Naringenin chalcone  | 4.125  | 90.78±1.35E+01  | 6.84 |
| 21 | Kaempferol           | 3.000  | 101.63±5.30E+00 | 1.15 |
| 22 | Apigenin             | 3.300  | 102.06±6.96E+00 | 1.44 |

**Figure S5.** Overlaid HPLC chromatograms of Pch-Bio-ByP (a1) and Pch-Bio-FinalP (b1) samples registered at  $\lambda = 280$  nm;  $\lambda = 320$  nm;  $\lambda = 370$  nm;  $\lambda = 360$  nm;  $\lambda = 250$  nm; the original chromatogram reports the Y-axis in the 0-600 mAU and 0-1200 mAU range, respectively; UV-Vis spectra of detected peaks of Pch-Bio-ByP (a2) and Pch-Bio-FinalP (b2); 2 = protocatechuic acid; 4= chlorogenic acid; 5= caffeic acid; 9= hyperoside; 10= isoquercitrin; 17= naringenin; 24 = chlorogenic acid derivative; 25 = hydroxycinnamic acid derivative; 27 = flavanone derivative.

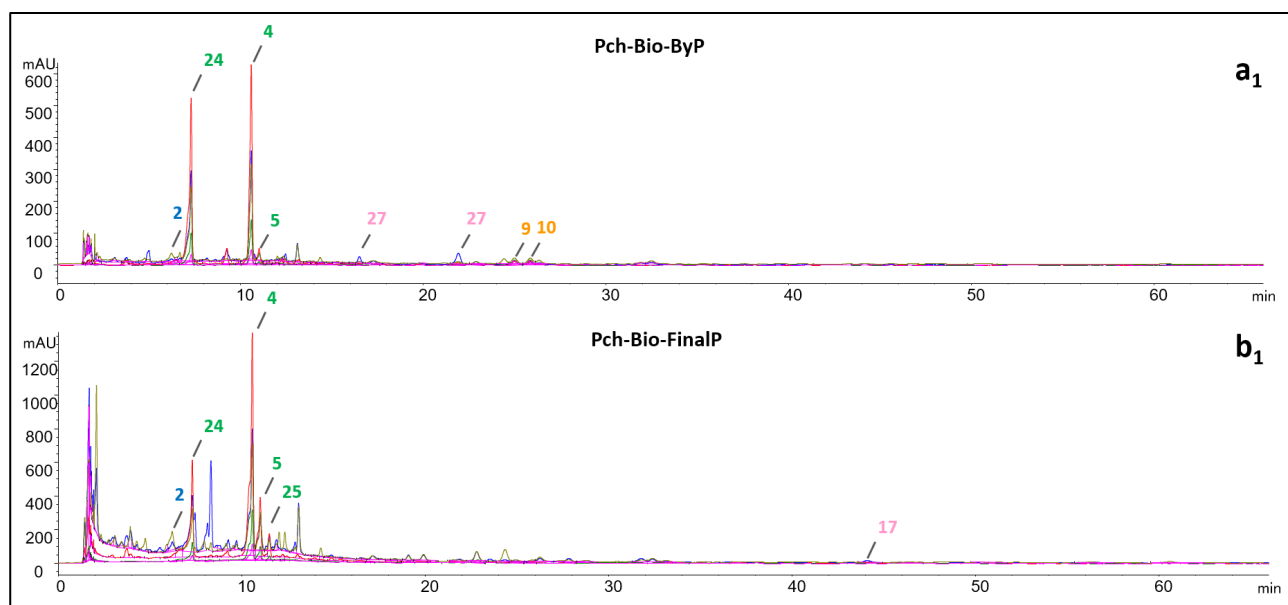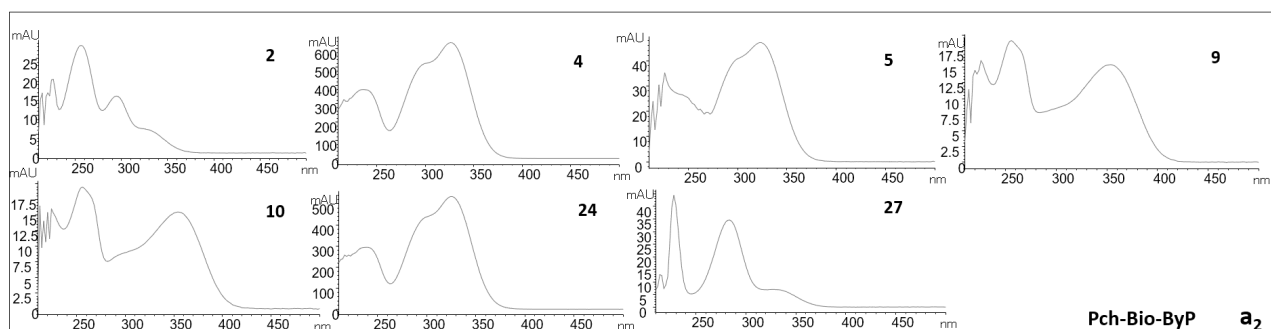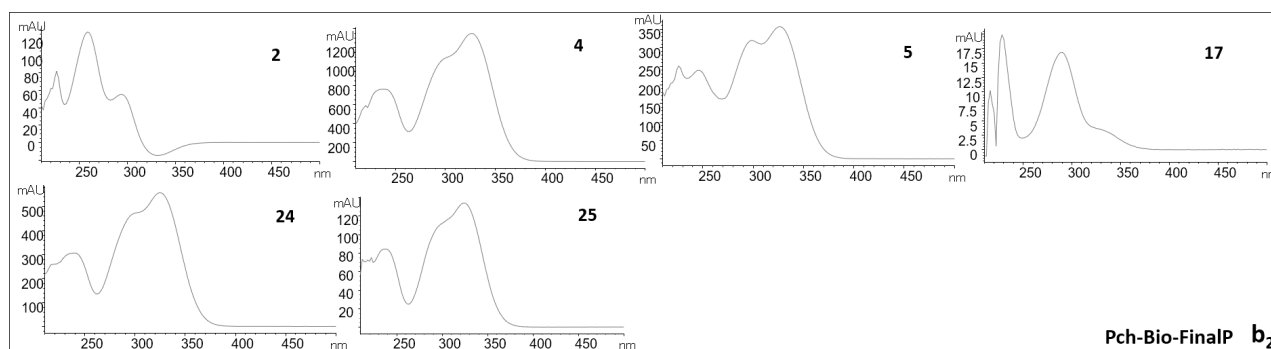

**Table S8.** Retention times of polyphenols identified in Pch-Bio-ByP and Pch-Bio-FinalP.

| Peak | Compound                        | Reference Standard | Pch-Bio-ByP (a1) | Pch-Bio-FinalP (b1) |
|------|---------------------------------|--------------------|------------------|---------------------|
|      |                                 |                    | Retention Time   | retention Time      |
| 2    | Protocatechuic acid             | 6.175              | 6.202            | 6.201               |
| 24   | Chlorogenic acid derivative     | /                  | 7.302            | 7.296               |
| 4    | Chlorogenic acid                | 10.597             | 10.593           | 10.577              |
| 5    | Caffeic acid                    | 11.522             | 11.037           | 11.017              |
| 25   | Hydroxycinnamic acid derivative | /                  | /                | 11.504              |
| 27   | Flavanone derivative            | /                  | 16.509           | /                   |

|    |                      |        |        |        |
|----|----------------------|--------|--------|--------|
| 27 | Flavanone derivative | /      | 21.914 | /      |
| 9  | Hyperoside           | 24.975 | 24.995 | /      |
| 10 | Isoquercitrin        | 25.828 | 25.849 | /      |
| 17 | Naringenin           | 44.200 | /      | 44.083 |

**Figure S6.** Overlaid HPLC chromatograms of Pch-Conv-ByP (a1) and Pch-Conv-FinalP (b1) samples registered at  $\lambda = 280$  nm;  $\lambda = 320$  nm;  $\lambda = 370$  nm;  $\lambda = 360$  nm;  $\lambda = 250$  nm; the original chromatogram reports the Y-axis in the 0-600 mAU and 0-1200 mAU range, respectively; UV-Vis spectra of detected peaks of Pch-Conv-ByP (a2) and Pch-Conv-FinalP (b2); 2 = protocatechuic acid; 4= chlorogenic acid; 5= caffeic acid; 9= hyperoside; 10= isoquercitrin; 17= naringenin; 24 = chlorogenic acid derivative; 25 = hydroxycinnamic acid derivative; 27 = flavanone derivative.

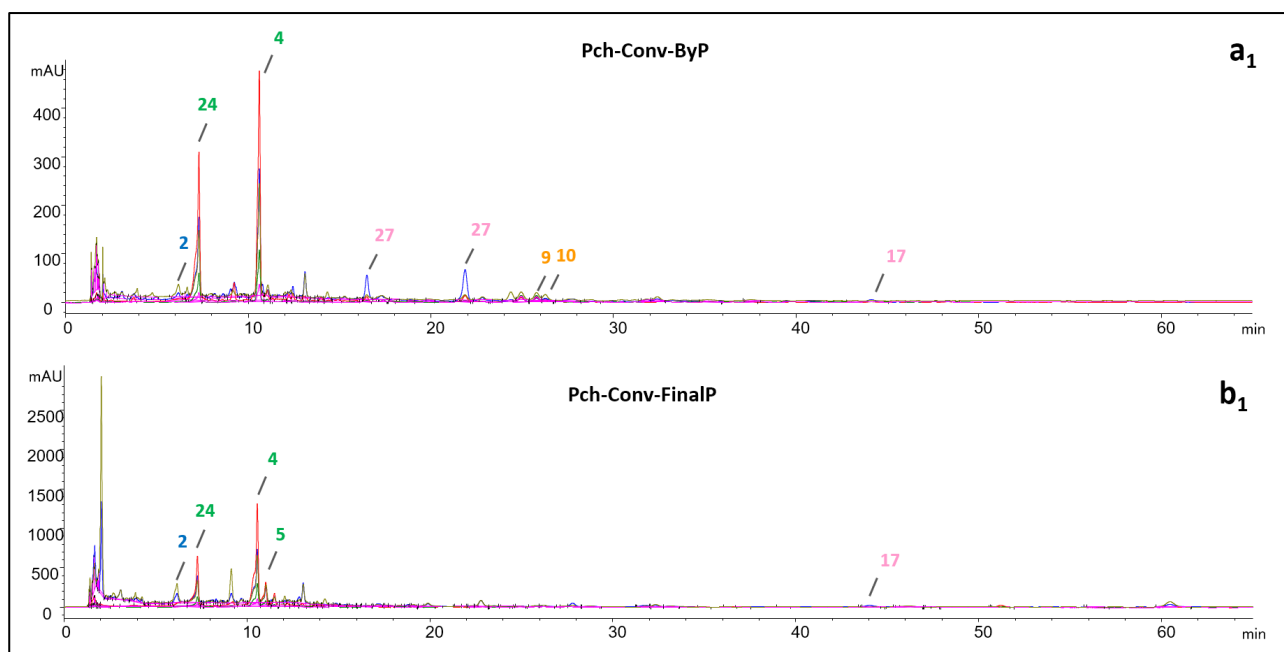

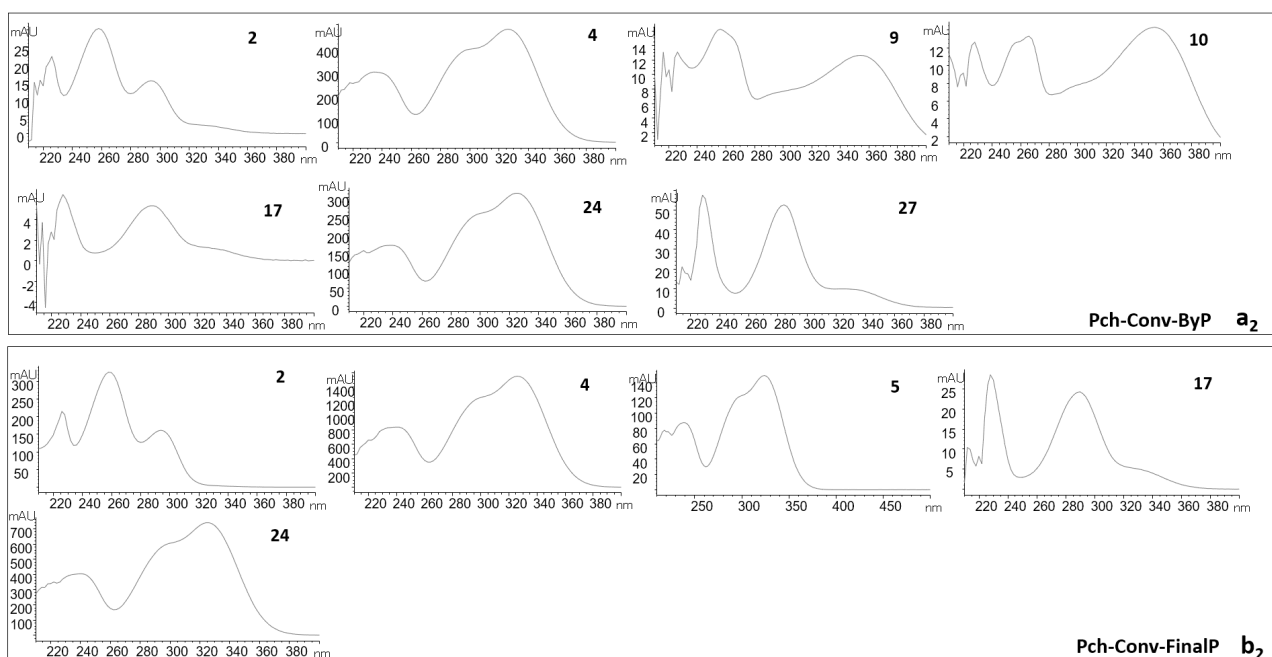

**Table S9.** Retention times of polyphenols identified in Pch-Conv-ByP and Pch-Conv-FinalP.

| Peak | Compound                    | Reference Standard | Pch-Conv-ByP (a1) | Pch-Conv-FinalP (b1) |
|------|-----------------------------|--------------------|-------------------|----------------------|
|      |                             | Retention Time     | Retention Time    | Retention Time       |
| 2    | Protocatechuic acid         | 6.175              | 6.186             | 6.181                |
| 24   | Chlorogenic acid derivative | /                  | 7.297             | 7.295                |
| 4    | Chlorogenic acid            | 10.597             | 10.585            | 10.575               |
| 5    | Caffeic acid                | 11.522             | 11.027            | 11.022               |
| 27   | Flavanone derivative        | /                  | 16.494            | /                    |
| 27   | Flavanone derivative        | /                  | 21.880            | /                    |
| 9    | Hyperoside                  | 24.975             | 24.947            | /                    |
| 10   | Isoquercitrin               | 25.828             | 25.797            | /                    |
| 17   | Naringenin                  | 44.200             | 44.104            | 44.032               |

**Figure S7.** Overlaid HPLC chromatograms of Ac-Bio-ByP (a1) and Ac-Bio-FinalP (b1) registered at  $\lambda=280\text{ nm}$ ;  $\lambda=320\text{ nm}$ ;  $\lambda=370\text{ nm}$ ;  $\lambda=360\text{ nm}$ ;  $\lambda=250\text{ nm}$ ; the original chromatogram reports the Y-axis in the 0-600 mAU and 0-1200 mAU range, respectively; UV-Vis spectra of detected peaks of Ac-Bio-ByP (a2) and Ac-Bio-FinalP (b2); 4= chlorogenic acid; 10= isoquercitrin; 11= (+)-rutin trihydrate; 14= quercitrin; 24 = chlorogenic acid derivative; 25 = hydroxycinnamic acid derivative.

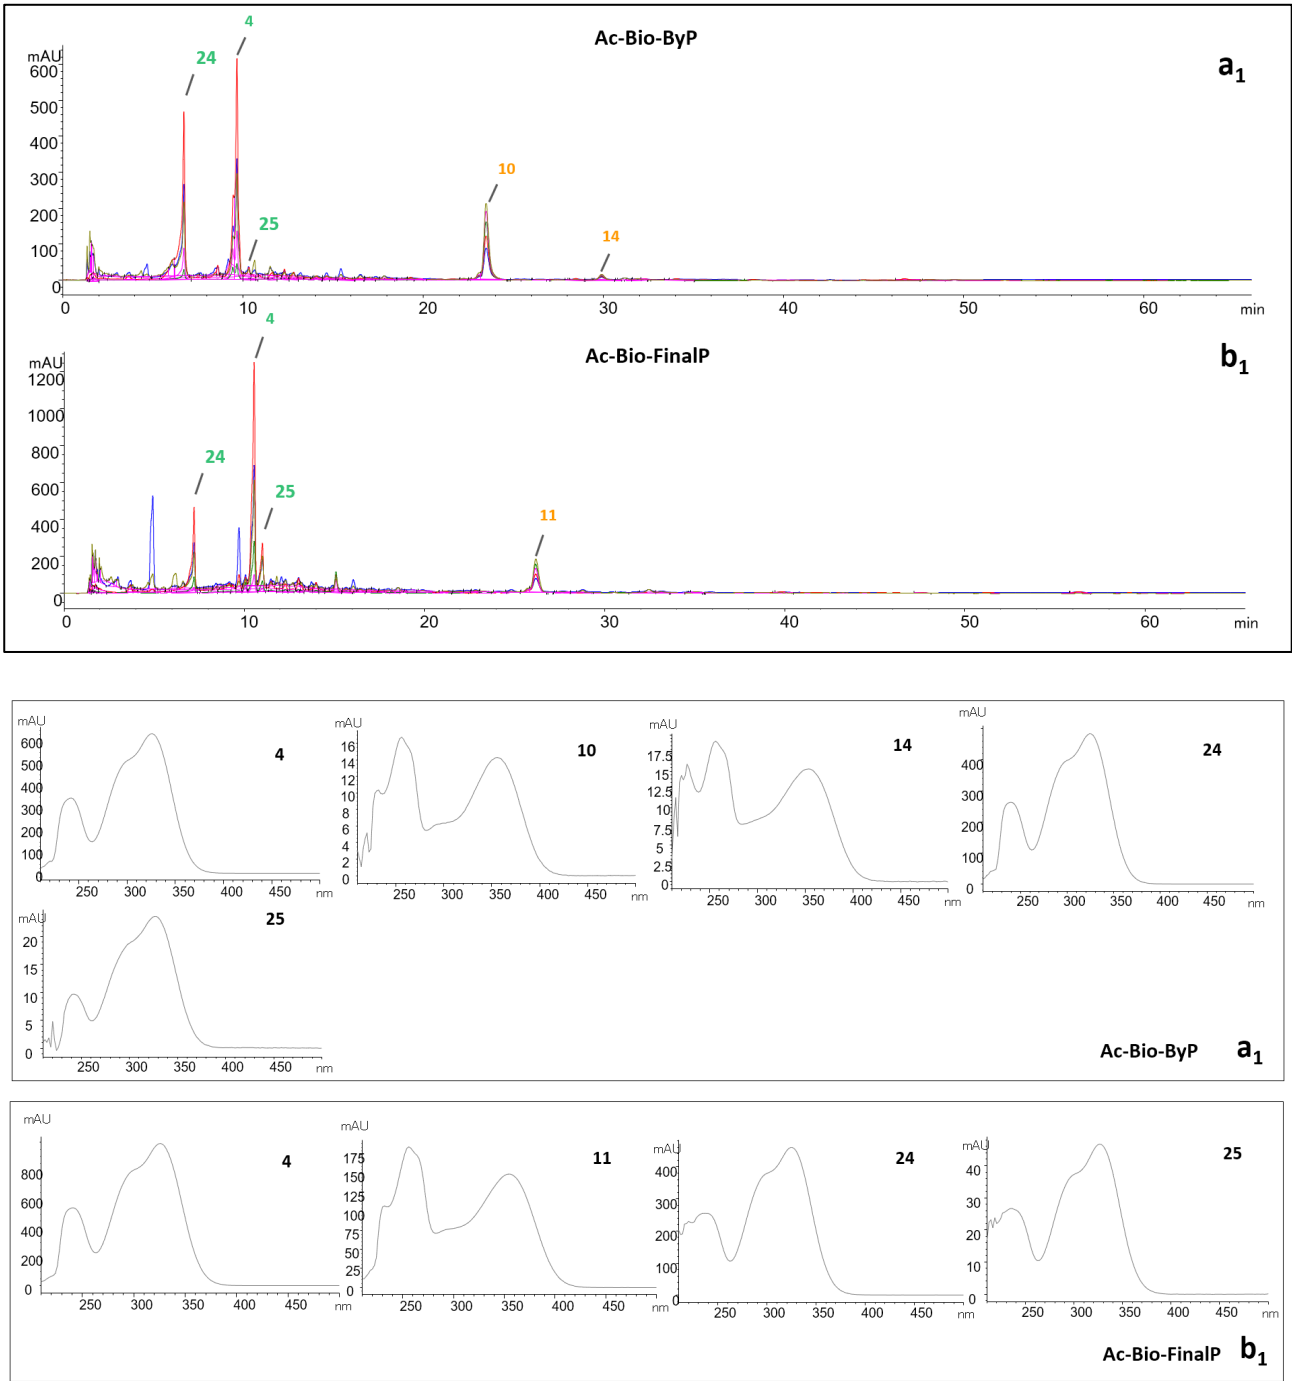

**Table S10.** Retention times of polyphenols identified in Ac-Bio-ByP and Ac-Bio-ByP.

| Peak | Reference                       |                |                 |                    |
|------|---------------------------------|----------------|-----------------|--------------------|
|      | Compound                        | Standard       | Ac-Bio-ByP (a1) | Ac-Bio-FinalP (b1) |
|      |                                 | Retention Time | Retention Time  | Retention Time     |
| 24   | Chlorogenic acid derivative     | /              | 6.798           | 6.897              |
| 4    | Chlorogenic acid                | 10.597         | 9.703           | 10.551             |
| 25   | Hydroxycinnamic acid derivative | /              | 12.340          | 13.980             |
| 10   | Isoquercitrin                   | 25.828         | 23.784          | /                  |
| 11   | (+)-Rutin trihydrate            | 26.301         | /               | 26.194             |
| 14   | Quercitrin                      | 32.934         | 30.269          | /                  |

**Figure S8.** Overlaid HPLC chromatograms of Ac-Conv-ByP (a1) and Ac-Conv-FinalP (b1) registered at  $\lambda = 280$  nm;  $\lambda = 320$  nm;  $\lambda = 370$  nm;  $\lambda = 360$  nm;  $\lambda = 250$  nm; the original chromatogram reports the Y-axis in the 0-600 mAU and 0-1200 mAU range, respectively; UV-Vis spectra of detected peaks of Ac-Bio-ByP (a2) and Ac-Bio-FinalP (b2); 4= chlorogenic acid; 10= isoquercitrin; 11= (+)-rutin trihydrate; 14= quercitrin; 24 = chlorogenic acid derivative; 25 = hydroxycinnamic acid derivative.

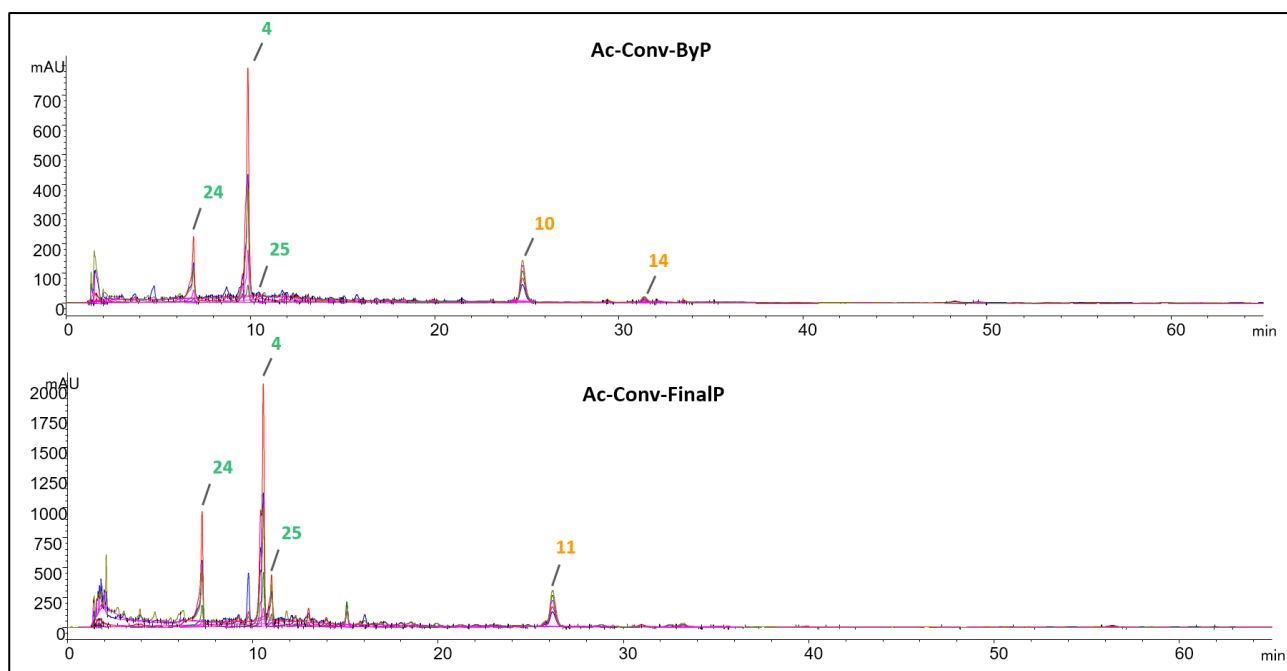

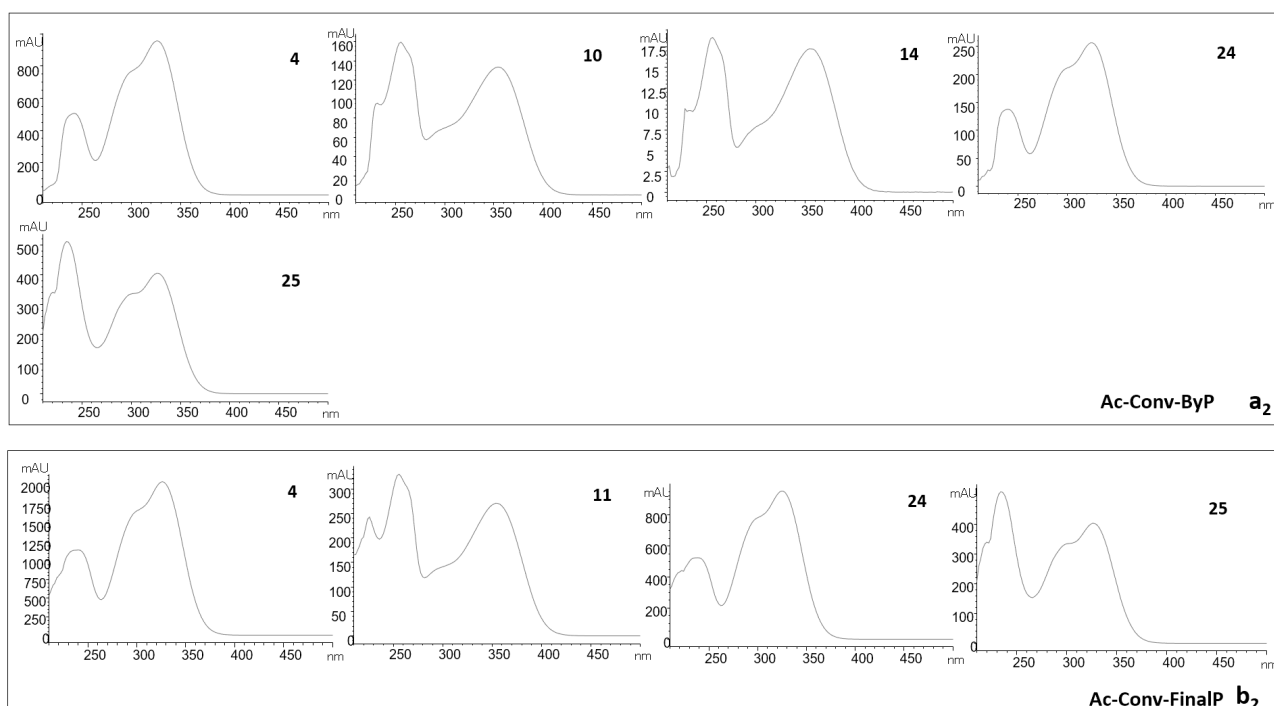

**Table S11.** Retention times of polyphenols identified in Ac-Conv-ByP and Ac-Conv-ByP.

| Peak | Compound                        | Reference Standard                   |                |                |
|------|---------------------------------|--------------------------------------|----------------|----------------|
|      |                                 | Ac-Conv-ByP (a1) Ac-Conv-FinalP (b1) |                |                |
|      |                                 | Retention time                       | Retention Time | Retention Time |
| 24   | Chlorogenic acid derivative     | /                                    | 6.984          | 7.298          |
| 4    | Chlorogenic acid                | 10.597                               | 9.969          | 10.580         |
| 25   | Hydroxycinnamic acid derivative | /                                    | 11.934         | 11.029         |
| 10   | Isoquercitrin                   | 25.828                               | 23.360         | /              |
| 11   | (+)-Rutin trihydrate            | 26.301                               | /              | 26.285         |
| 14   | Quercitrin                      | 32.934                               | 30.053         | /              |

**Figure S9.** Overlaid HPLC chromatograms of T-Bio-ByP (a1) and T-Bio-FinalP (b1) samples registered at  $\lambda = 280$  nm;  $\lambda = 320$  nm;  $\lambda = 370$  nm;  $\lambda = 360$  nm;  $\lambda = 250$  nm; the original chromatogram reports the Y-axis in the 0-400 mAU and 0-2000 mAU range, respectively; UV-Vis spectra of detected peaks of T-Bio-ByP (a2) and T-Bio-FinalP (b2); 4= chlorogenic acid; 5= caffeic acid; 11= (+)-rutin trihydrate; 17= naringenin; 25 = hydroxycinnamic acid derivative; 27= flavanone derivative; 28 = flavonol derivative.

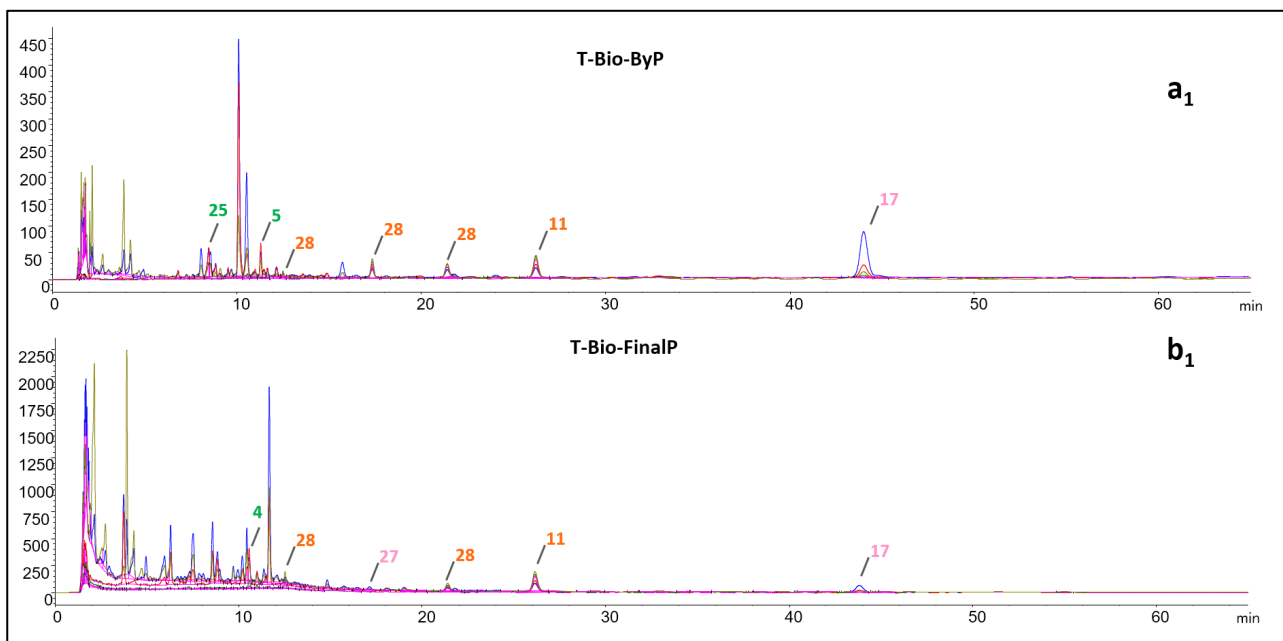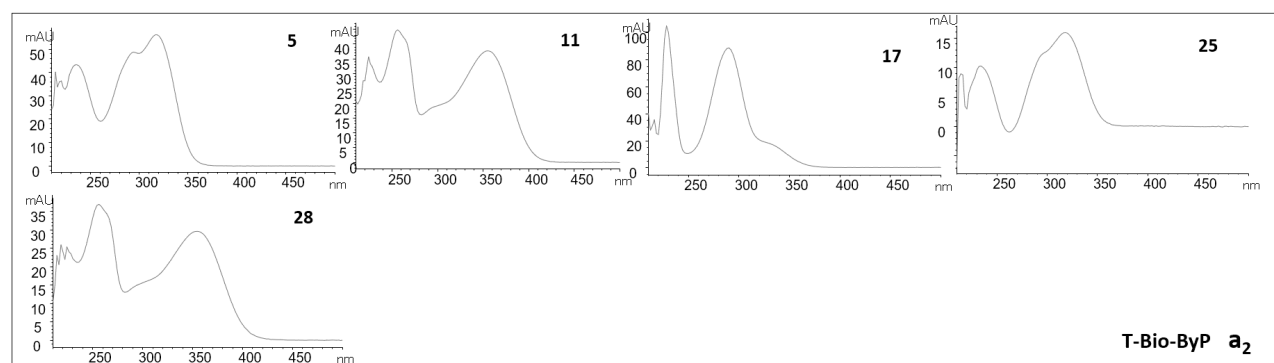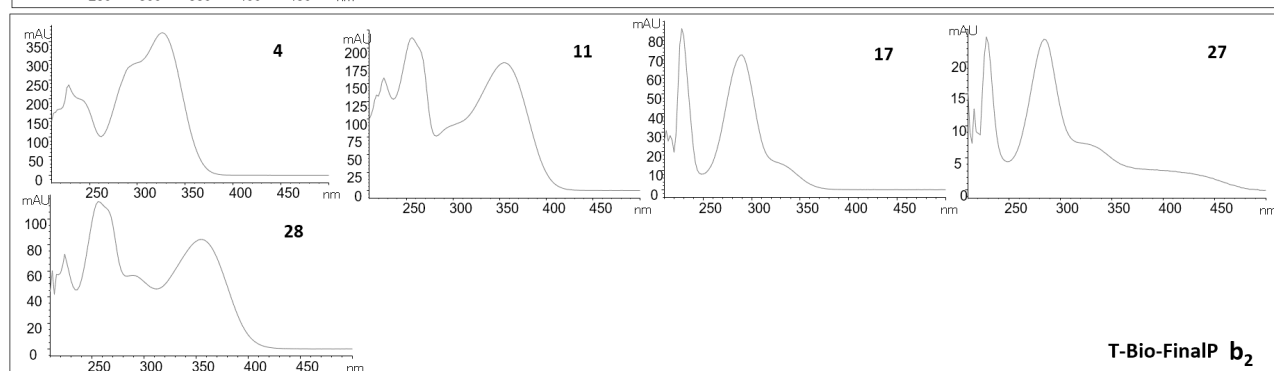



**Table S12.** Retention times of polyphenols identified in T-Bio-ByP and T-Bio-FinalP.

| Peak |                             | Reference Standard | T-Bio-ByP (a1) | T-Bio-FinalP (b1) |
|------|-----------------------------|--------------------|----------------|-------------------|
|      | Compound                    | Retention Time     | Retention Time | Retention Time    |
| 25   | Chlorogenic acid derivative | /                  | 9.558          | /                 |
| 4    | Chlorogenic acid            | 10.597             | /              | 10.564            |
| 5    | Caffeic acid                | 11.522             | 11.331         | /                 |
| 28   | Flavonol derivative         | /                  | 12.527         | /                 |
| 27   | Flavanone derivative        | /                  | /              | 16.448            |
| 28   | Flavonol derivative         | /                  | 17.457         | /                 |
| 28   | Flavonol derivative         | /                  | 21.602         | 21.575            |
| 11   | (+)-Rutin trihydrate        | 26.301             | 26.270         | 26.214            |
| 17   | Naringenin                  | 44.200             | 43.709         | 43.673            |

**Figure S10.** Overlaid HPLC chromatograms of T-LI-ByP (a1) and T-Conv-FinalP (b1) samples registered at  $\lambda = 280$  nm;  $\lambda = 320$  nm;  $\lambda = 370$  nm;  $\lambda = 360$  nm;  $\lambda = 250$  nm; the original chromatogram reports the Y-axis in the 0-400 mAU and 0-2000 mAU range, respectively; UV-Vis spectra of detected peaks of T-LI-ByP (a2) and T-Conv-FinalP (b2); 4= chlorogenic acid; 5= caffeic acid; 11= (+)-rutin trihydrate; 17= naringenin; 25 = hydroxycinnamic acid derivative; 27= flavanone derivative; 28 = flavonol derivative.

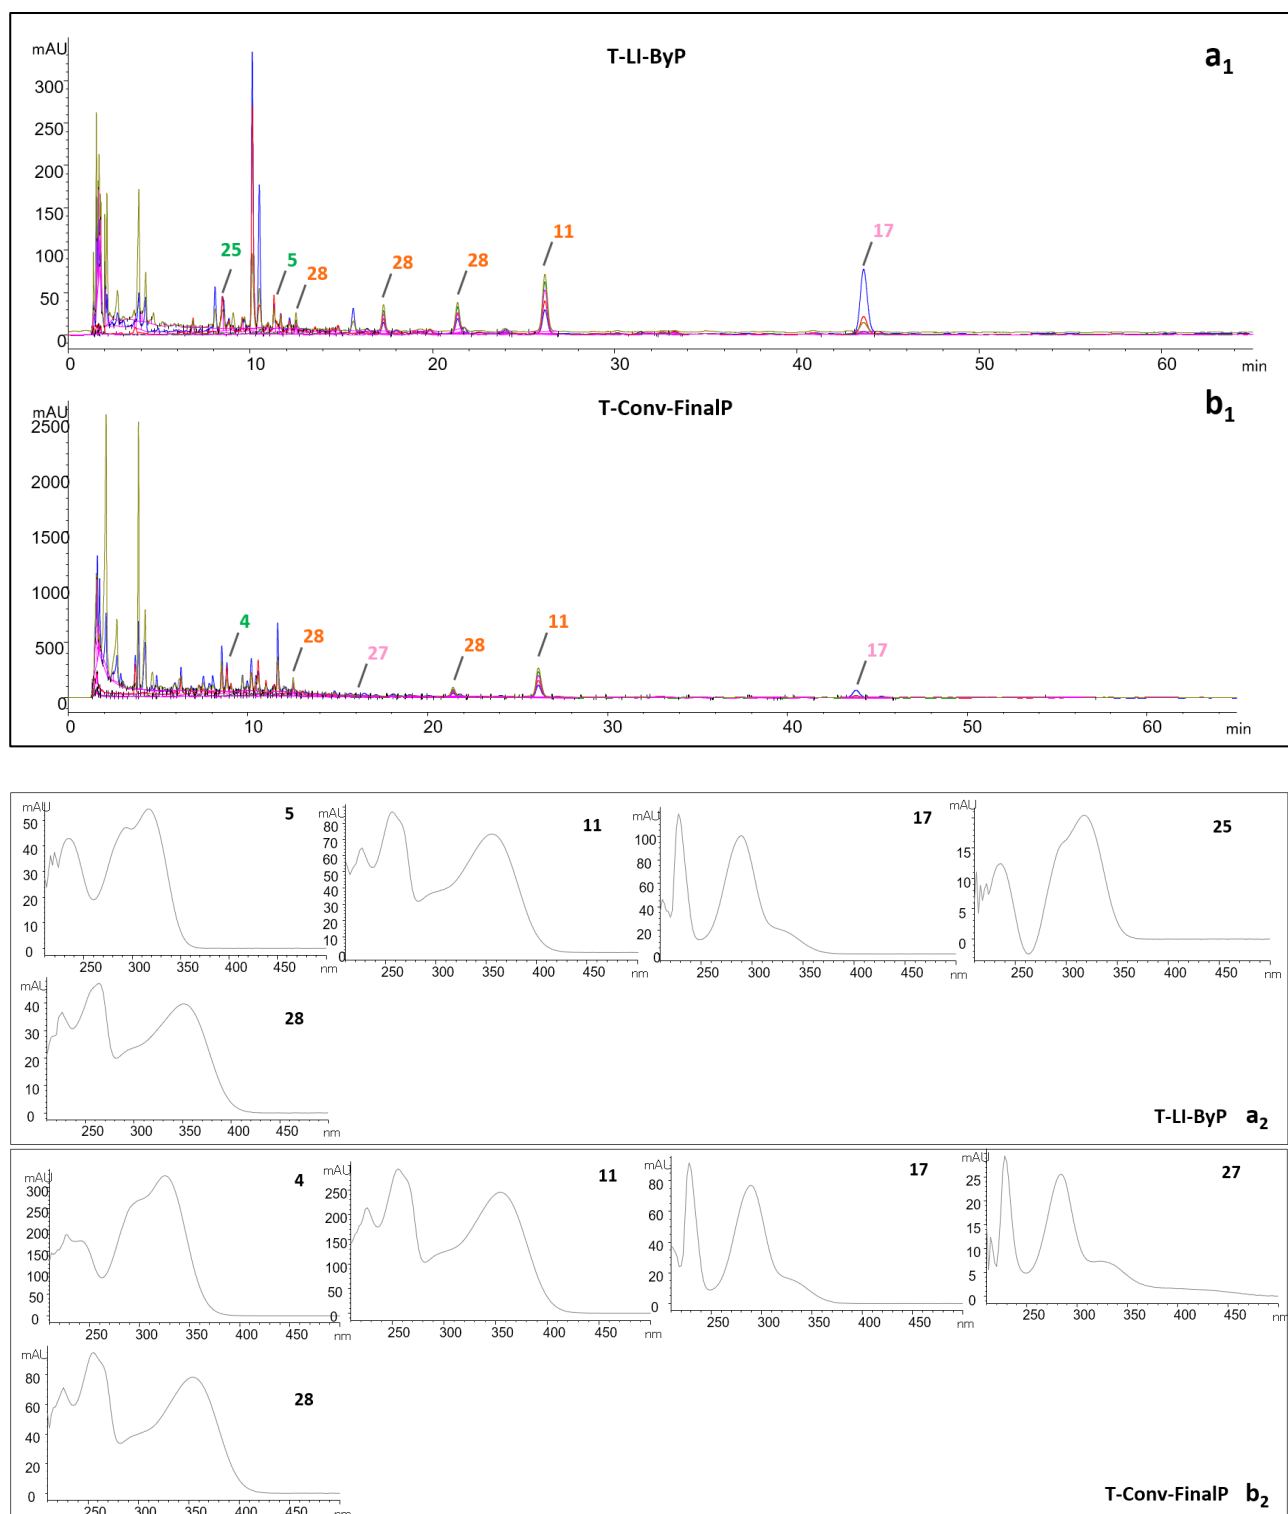

**Table S13.** Retention times of polyphenols identified in T-LI-ByP and T-Conv-FinalP.

| Peak     | Reference Standard          | T-LI-ByP (a <sub>1</sub> ) | T-Conv-FinalP (b <sub>1</sub> ) |
|----------|-----------------------------|----------------------------|---------------------------------|
| Compound | Retention Time              | Retention Time             | Retention Time                  |
| 25       | Chlorogenic acid derivative | /                          | 9.552                           |
| 4        | Chlorogenic acid            | 10.597                     | /                               |

|    |                      |        |        |        |
|----|----------------------|--------|--------|--------|
| 5  | Caffeic acid         | 11.522 | 11.317 | /      |
| 28 | Flavonol derivative  | /      | 12.523 | /      |
| 27 | Flavanone derivative | /      | /      | 16.444 |
| 28 | Flavonol derivative  | /      | 17.349 | /      |
| 28 | Flavonol derivative  | /      | 21.431 | 21.277 |
| 11 | (+)-Rutin trihydrate | 26.301 | 26.219 | 26.073 |
| 17 | Naringenin           | 44.200 | 43.861 | 43.707 |

---

**Figure S11.** Overlaid HPLC chromatograms of Apl-Bio-ByP (a1), Apl-Conv-ByP (b1) and Apl-FinalP (c1) samples registered at  $\lambda = 280$  nm;  $\lambda = 320$  nm;  $\lambda = 370$  nm;  $\lambda = 360$  nm;  $\lambda = 250$  nm; the original chromatogram reports the Y-axis in the 0-250 mAU and 0-1000 mAU range, respectively; UV-Vis spectra of detected peaks of Apl-Bio-ByP (a2), Apl-Conv-ByP (b2), and Apl-FinalP (c2); 2= protocatechuic acid; 4 = chlorogenic acid; 5 = caffeic acid; 6= (-)-epicatechin; 9= hyperoside; 10= isoquercitrin; 11= (+)-rutin trihydrate; 12= phloridzin dihydrate; 14= quercitrin; 15= myricetin; 25 = hydroxycinnamic acid derivatives; 29 = dihydrochalcone (phloridzin) derivative.

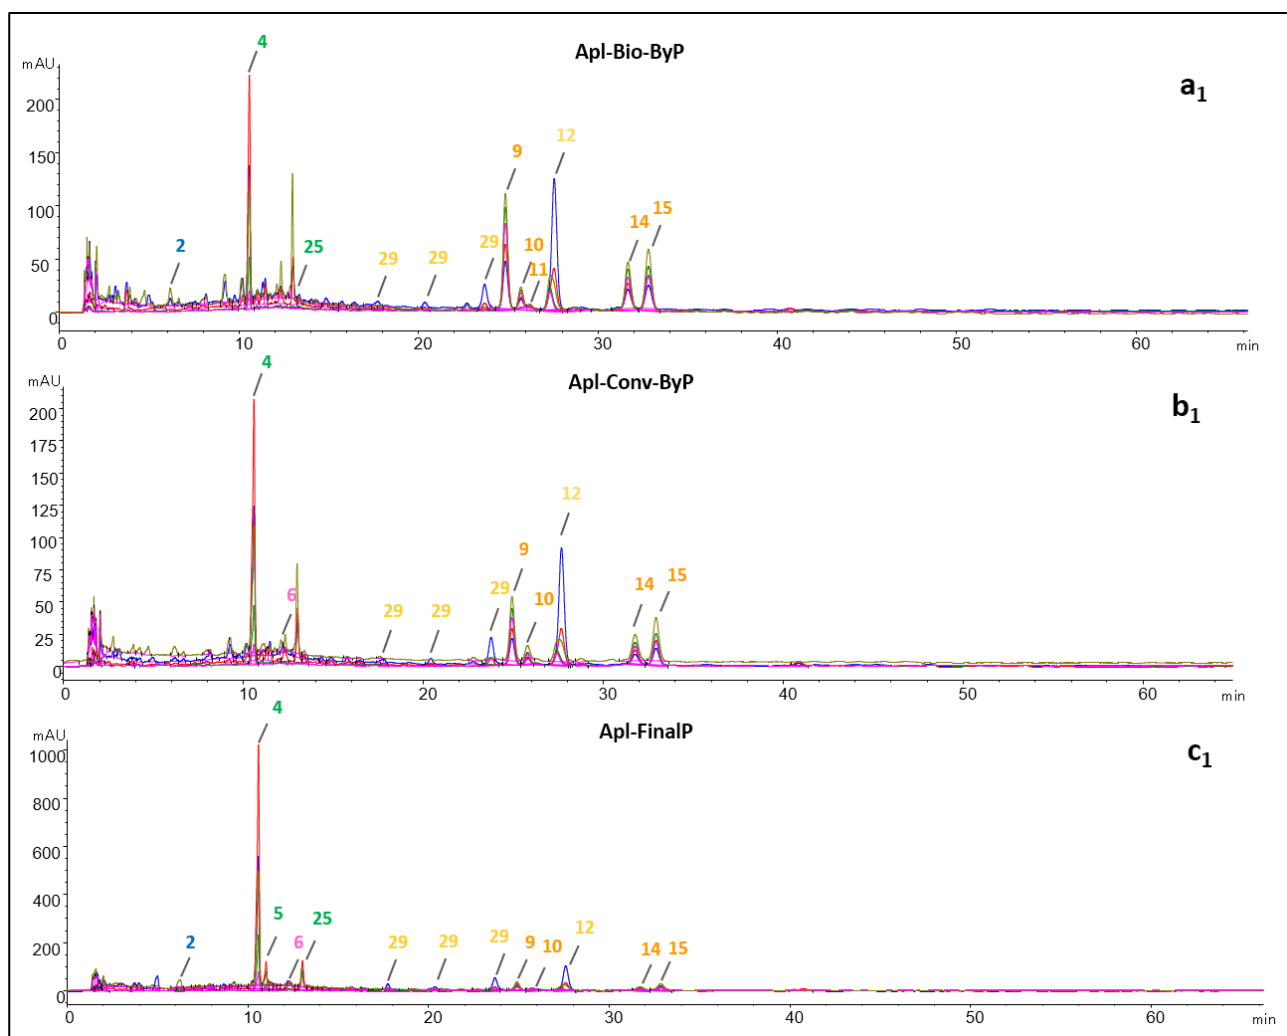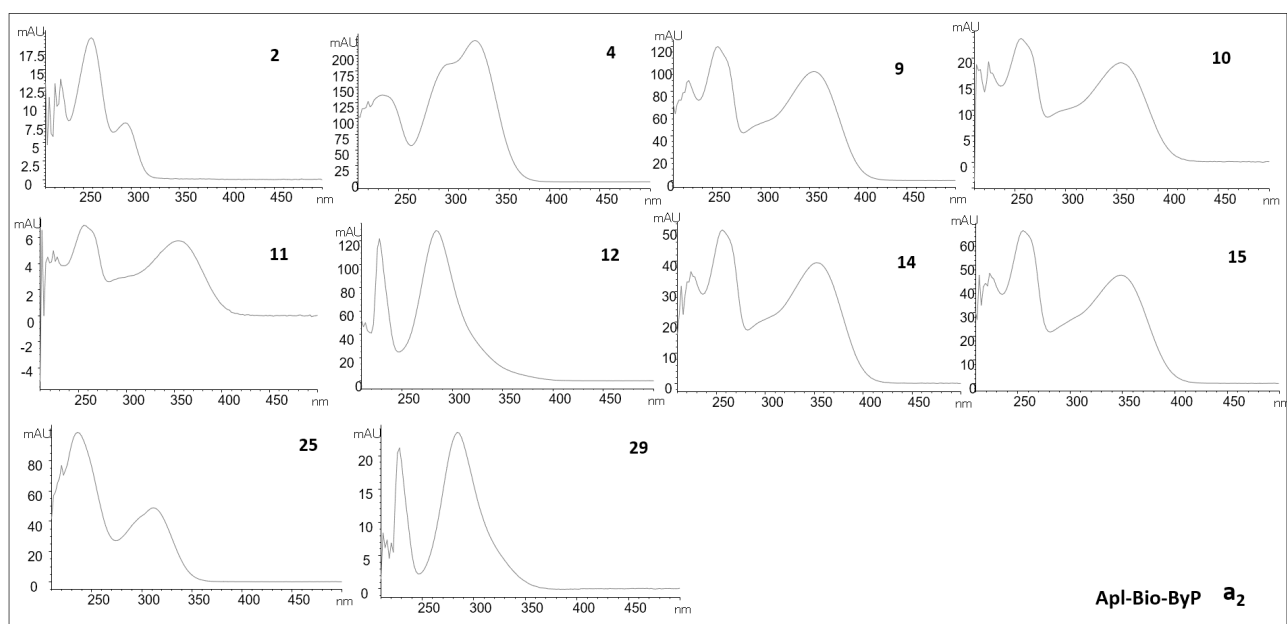

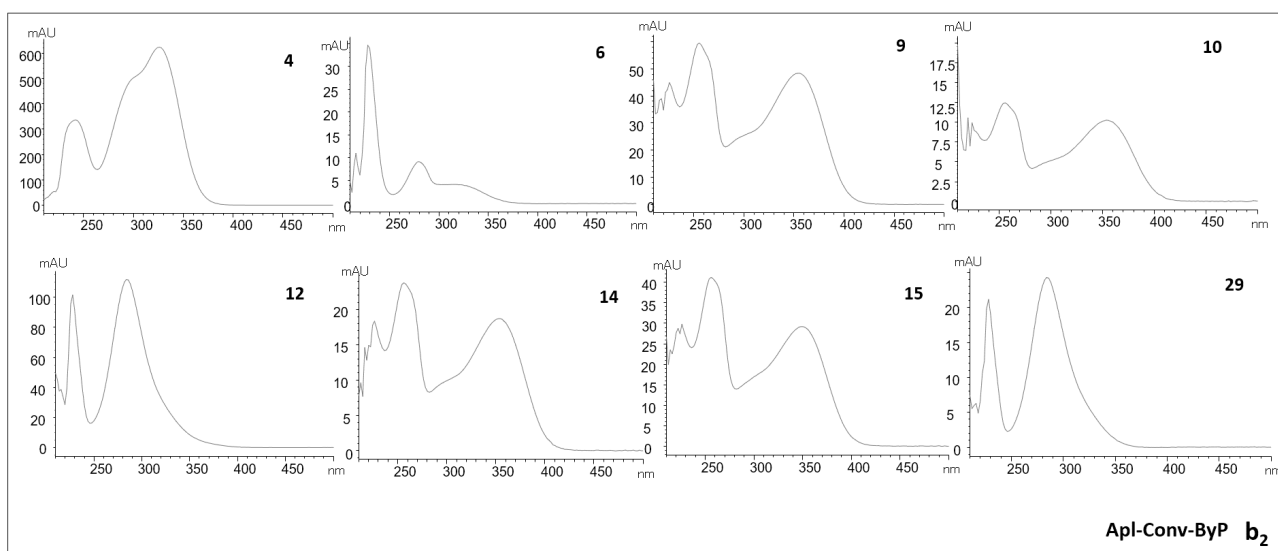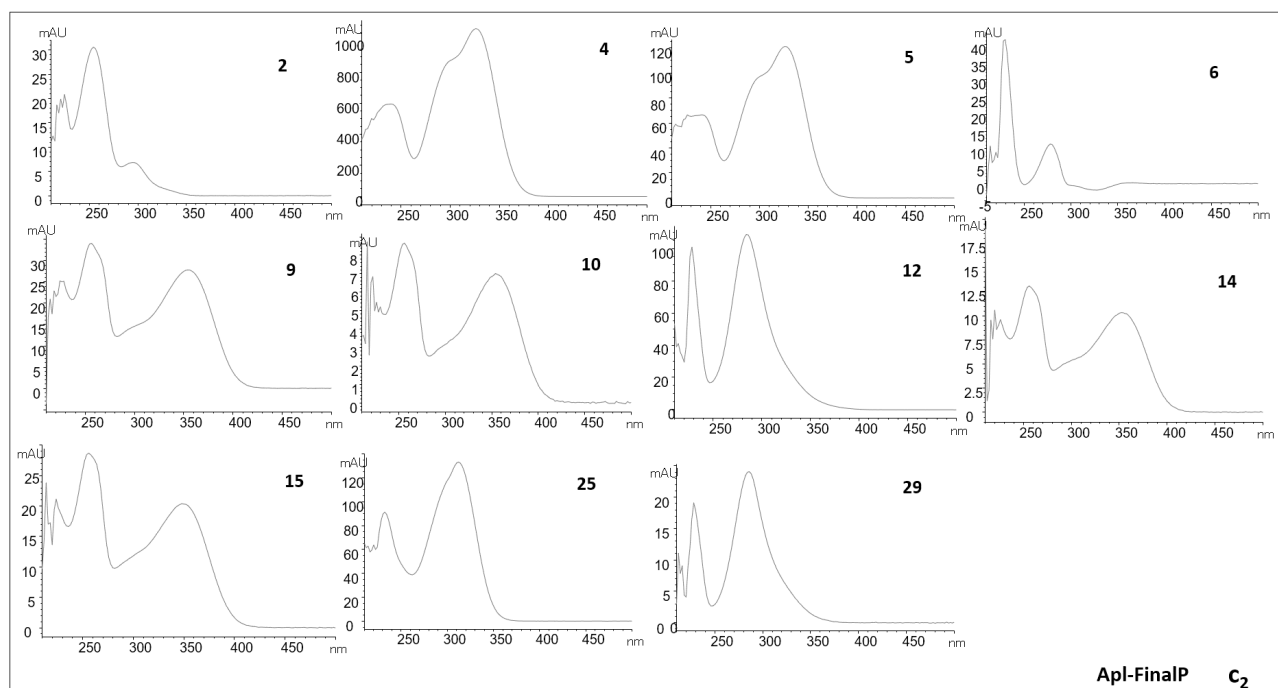

**Table S14.** Retention times of polyphenols identified in Apl-Bio-ByP, Apl-Conv-ByP, and Apl-FinalP.

| Peak | Compound            | Reference Standard<br>Retention Time | Apl-Conv-ByP (b1) |                     |                |
|------|---------------------|--------------------------------------|-------------------|---------------------|----------------|
|      |                     |                                      | Apl-Bio-ByP (a1)  | Apl-Bio-FinalP (c1) |                |
|      |                     |                                      |                   | Retention Time      |                |
|      |                     |                                      |                   | Retention Time      | Retention Time |
| 2    | Protocatechuic acid | 6.175                                | 6.178             | /                   | 6.182          |
| 4    | Chlorogenic acid    | 10.597                               | 10.574            | 10.585              | 10.574         |
| 5    | Caffeic acid        | 11.522                               | /                 | /                   | 11.013         |
| 6    | (-)-Epicatechin     | 12.204                               | /                 | 12.204              | 12.199         |

|    |                                  |        |        |        |        |
|----|----------------------------------|--------|--------|--------|--------|
| 25 | Hydroxycinnamic acid derivatives | /      | 13.367 | /      | 13.380 |
| 29 | Phlorizin dihydrate derivative   | /      | 17.738 | 17.792 | 17.741 |
| 29 | Phlorizin dihydrate derivative   | /      | 20.361 | 20.424 | 20.365 |
| 29 | Phlorizin dihydrate derivative   | /      | 23.677 | 23.765 | 23.674 |
| 9  | Hyperoside                       | 24.975 | 24.853 | 24.963 | 24.940 |
| 10 | Isoquercitrin                    | 25.828 | 25.726 | 25.826 | 25.807 |
| 11 | (+)-Rutin trihydrate             | 26.301 | 26.203 | /      | /      |
| 12 | Phloridzin dihydrate             | 27.814 | 27.577 | 27.692 | 27.679 |
| 14 | Quercitrin                       | 32.934 | 31.665 | 31.801 | 31.776 |
| 15 | Myricetin                        | 33.915 | 32.818 | 32.956 | 32.930 |

---

**Figure S12.** Quantitative phenolic characterization of peach samples.

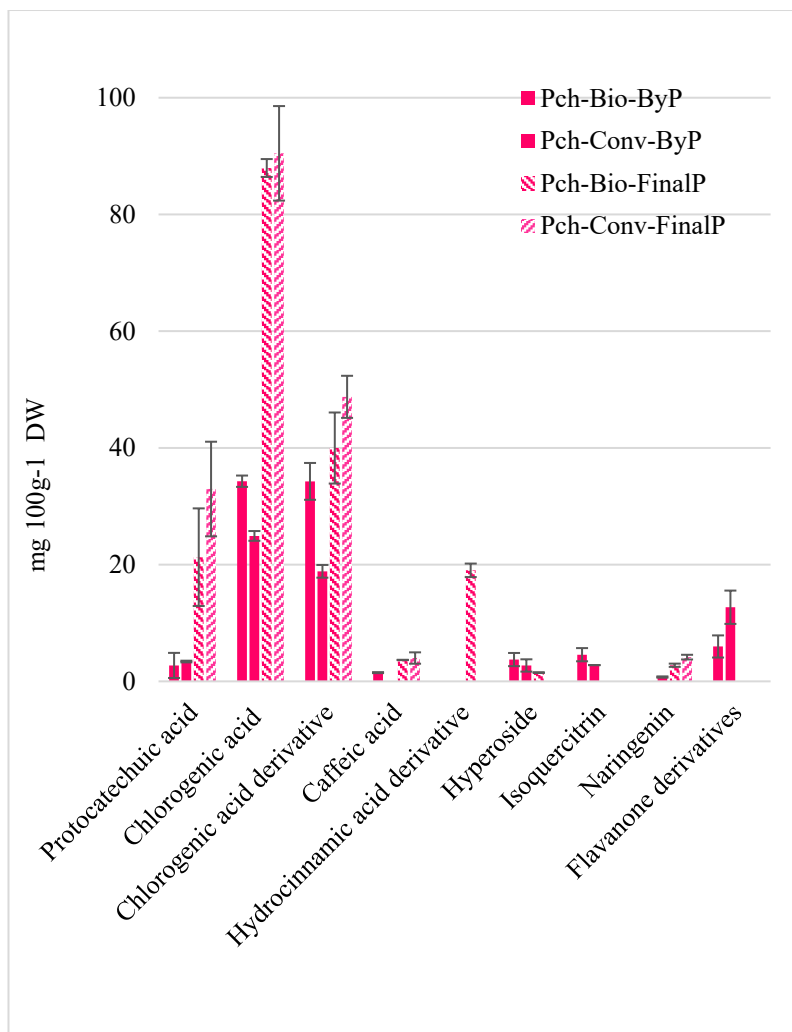

**Table S15.** Quantification of polyphenols in each peach sample expressed in mg 100g<sup>-1</sup> DW.

|                                 | Pch-Bio-ByP                        | Pch-Conv- ByP                      | Pch-Bio-FinalP                     | Pch-Conv- FinalP                   |
|---------------------------------|------------------------------------|------------------------------------|------------------------------------|------------------------------------|
| Compound                        | mg 100g <sup>-1</sup> DW±SD<br>n=3 |
| Protocatechuic acid             | 2.73±2.15E+00                      | 3.40±1.45E-01                      | 21.27±8.37E+00                     | 32.95±8.11E+00                     |
| Chlorogenic acid                | 34.29±9.71E-01                     | 24.92±8.37E-01                     | 87.96±1.53E+00                     | 90.47±8.10E+00                     |
| Chlorogenic acid derivative     | 34.26±3.15E+00                     | 18.85±1.09E+00                     | 39.98±6.09E+00                     | 48.75±3.61E+00                     |
| Caffeic acid                    | 1.50±8.38E-02                      | /                                  | 3.67±2.93E-02                      | 4.00±9.74E-01                      |
| Hydroxycinnamic acid derivative | /                                  | /                                  | 19.02±1.16E+00                     | /                                  |
| Hyperoside                      | 3.73±1.13E+00                      | 2.72±1.05E+00                      | 1.50±2.65E-02                      | /                                  |
| Isoquercitrin                   | 4.57±1.13E+00                      | 2.78±1.49E-02                      | /                                  | /                                  |
| Naringenin                      | /                                  | 0.74±1.10E-01                      | 2.76±2.78E-01                      | 4.15±4.02E-01                      |
| Flavanone derivatives           | 5.98±1.90E+00                      | 12.70±2.85E+00                     | /                                  | /                                  |

**Figure S13.** Quantitative phenolic characterization of apple samples.

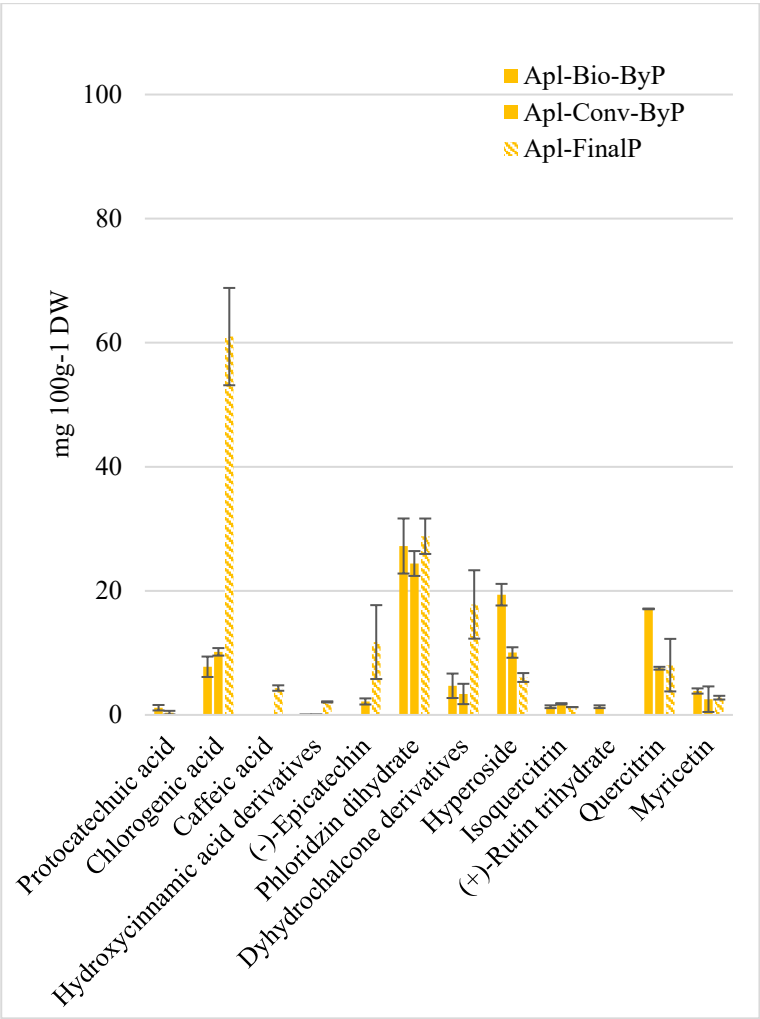

**Table S16.** Quantification of polyphenols in each apple sample expressed in mg 100g<sup>-1</sup> DW.

|                     | Apl-Bio- ByP                | Apl-Conv-SP                 | Apl- FinalP                 |
|---------------------|-----------------------------|-----------------------------|-----------------------------|
| Compound            | mg 100g <sup>-1</sup> DW±SD | mg 100g <sup>-1</sup> DW±SD | mg 100g <sup>-1</sup> DW±SD |
|                     | n=3                         | n=3                         | n=3                         |
| Protocatechuic acid | 1.16±4.41E-01               | 0.37±2.90E-01               | /                           |
| Chlorogenic acid    | 7.76±1.65E+00               | 10.17±6.07E-01              | 60.98±7.84E+00              |
| Caffeic acid        | /                           | /                           | 4.33±4.40E-01               |



|                                  |                |                |                |
|----------------------------------|----------------|----------------|----------------|
| Hydroxycinnamic acid derivatives | 0.03±8.00E-03  | 0.04±2.58E-02  | 2.10±9.39E-02  |
| (-)-Epicatechin                  | /              | 2.17±4.93E-01  | 11.74±5.96E+00 |
| Phloridzin dihydrate             | 27.23±4.44E+00 | 24.41±2.00E+00 | 28.80±2.86E+00 |
| Dihydrochalcone derivatives      | 4.69±1.97E+00  | 3.38±1.64E+00  | 17.80±5.51E+00 |
| Hyperoside                       | 19.38±1.74E+00 | 10.06±8.45E-01 | 6.03±7.14E-01  |
| Isoquercitrin                    | 0.68±1.68E-01  | 1.79±1.07E-01  | 1.44±2.52E-01  |
| (+)-Rutin trihydrate             | 1.32±2.23E-01  | /              | /              |
| Quercitrin                       | 17.09±5.77E-02 | 7.53±2.25E-01  | 8.02±4.23E+00  |
| Myricetin                        | 3.85±4.22E-01  | 2.54±2.06E+00  | 2.78±2.99E-01  |

---

**Figure S14.** Quantitative phenolic characterization of apricot samples.

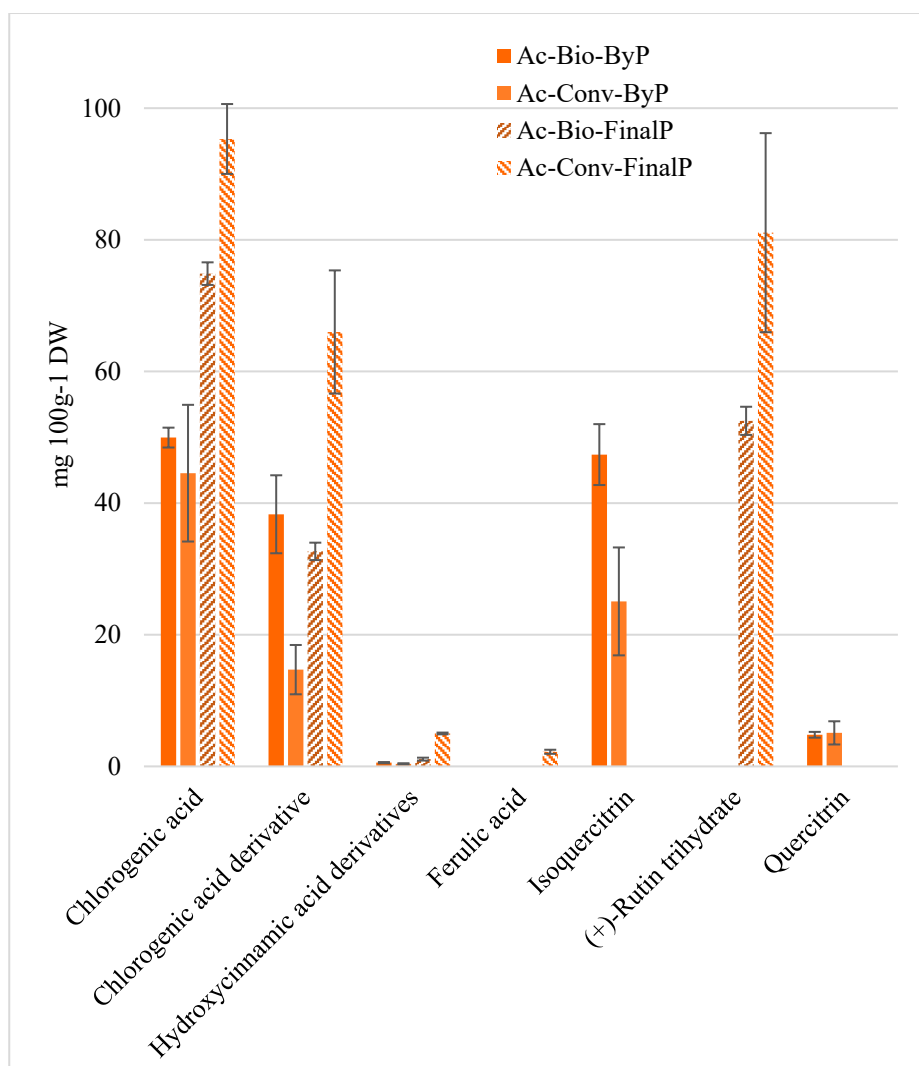

**Table S17.** Quantification of polyphenols in each apricot sample expressed in mg 100g<sup>-1</sup> DW.

|                                  | Ac-Bio- ByP                        | Ac-Conv- ByP                       | Ac-Bio- FinalP                     | Ac-Conv- FinalP                    |
|----------------------------------|------------------------------------|------------------------------------|------------------------------------|------------------------------------|
| Compound                         | mg 100g <sup>-1</sup> DW±SD<br>n=3 |
| Chlorogenic acid                 | 49.95±1.51E+00                     | 44.55±1.04E+01                     | 74.86±1.72E+00                     | 95.32±5.31E+00                     |
| Chlorogenic acid derivative      | 38.30±5.92E+00                     | 14.70±3.75E+00                     | 32.67±1.32E+00                     | 66.00±9.35E+00                     |
| Hydroxycinnamic acid derivatives | 0.57±9.12E-02                      | 0.38±1.01E-01                      | 1.11±2.19E-01                      | 5.00±1.34E-01                      |
| Ferulic acid                     | /                                  | /                                  | /                                  | 2.22±3.11E-01                      |
| Isoquercitrin                    | 47.37±4.63E+00                     | 25.07±8.20E+00                     | /                                  | /                                  |
| (+)-Rutin trihydrate             | /                                  | /                                  | 52.50±2.14E+00                     | 81.09±1.51E+01                     |

**Figure S15.** Quantitative phenolic characterization of tomato samples.

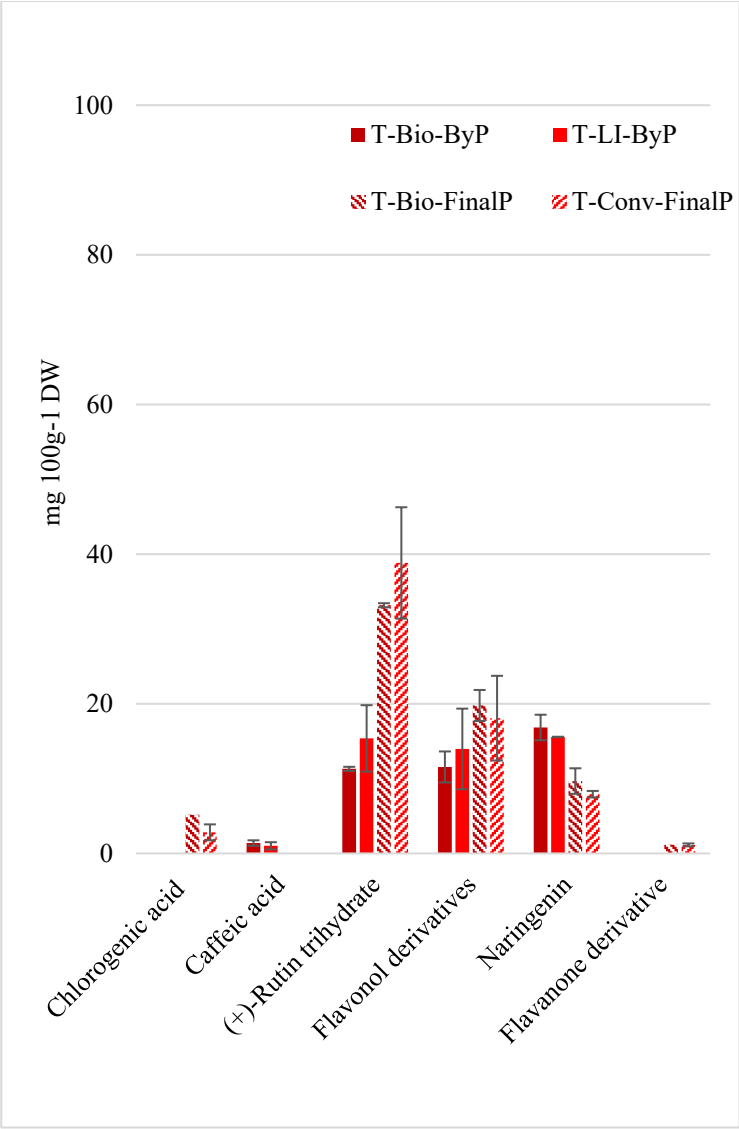

**Table S18.** Quantification of polyphenols in each tomato sample expressed in mg 100g<sup>-1</sup> DW.

|                       | T-Bio- ByP                  | T-Li- ByP                   | T-Bio- FinalP               | T-Conv- FinalP              |
|-----------------------|-----------------------------|-----------------------------|-----------------------------|-----------------------------|
| Compound              | mg 100g <sup>-1</sup> DW±SD |
|                       | n=3                         | n=3                         | n=3                         | n=3                         |
| Chlorogenic acid      | /                           | /                           | 5.18±2.22E+00               | 2.82±1.06E+00               |
| Caffeic acid          | 1.39±3.62E-01               | 1.02±4.82E-01               | /                           | /                           |
| (+)-Rutin Trihydrate  | 11.31±2.71E-01              | 15.37±4.44E+00              | 33.17±8.61E+00              | 38.83±7.44E+00              |
| Flavonol derivatives  | 11.56±2.07E+00              | 13.96±5.39E+00              | 19.78±5.82E+00              | 18.08±5.66E+00              |
| Naringenin            | 16.83±1.71E+00              | 15.57±2.41E-02              | 9.67±1.22E+00               | 7.92±4.37E-01               |
| Flavanaone derivative | /                           | /                           | 1.18±3.57E-01               | 1.14±1.98E-01               |

**Figure S16.** Graphs showing the correlations between the sum of the individual quantities of phenolic compounds (SPC), determined by HPLC, and the total phenolic content (TPC) values. Each graph refers to the results obtained for both fruit by-products and the final products of each sample type (A) peach samples; B) apricot samples; C) apple samples; D) tomato samples). Results are expressed as the mean value of three replicates (n=3).

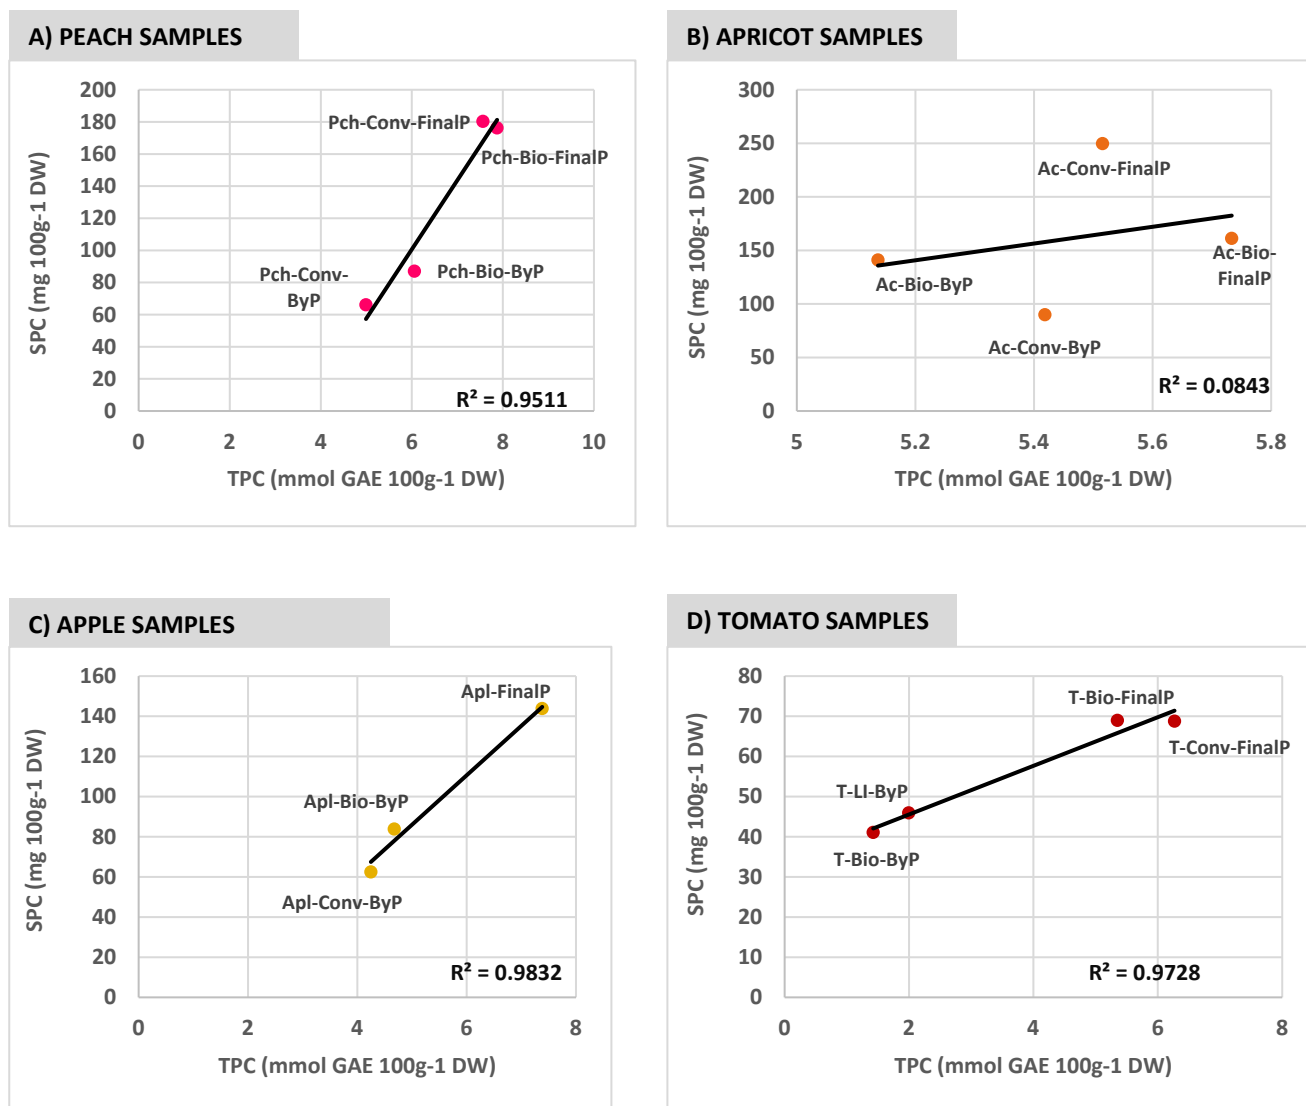

**Figure S17.** Characteristic UV-Vis spectra of standards classified according to their phenolic classes/families.

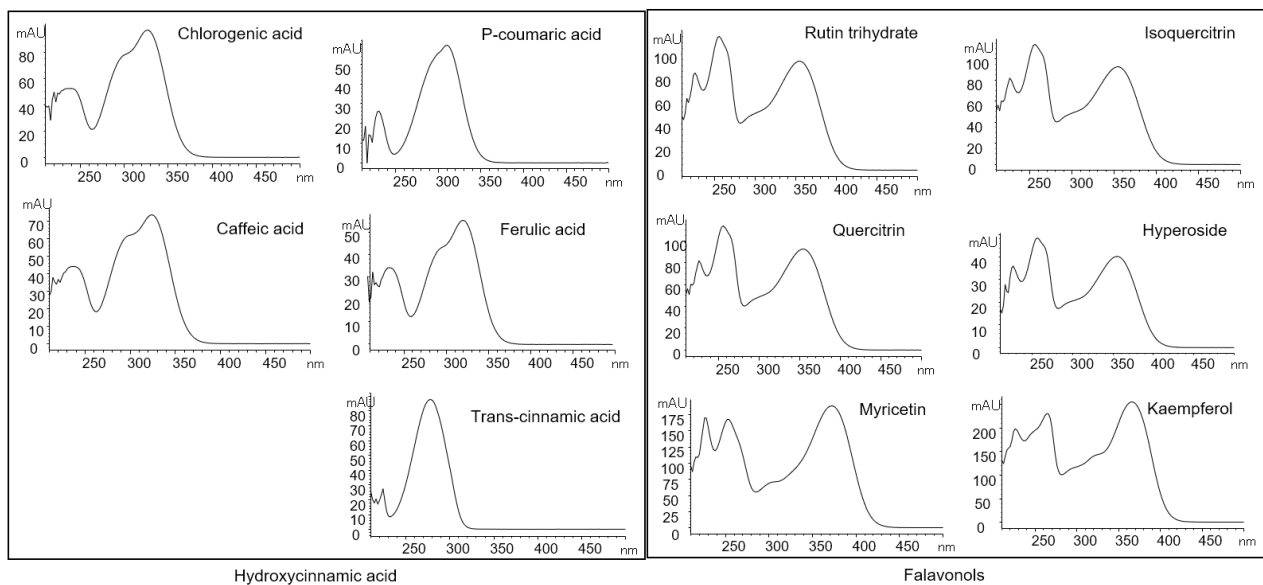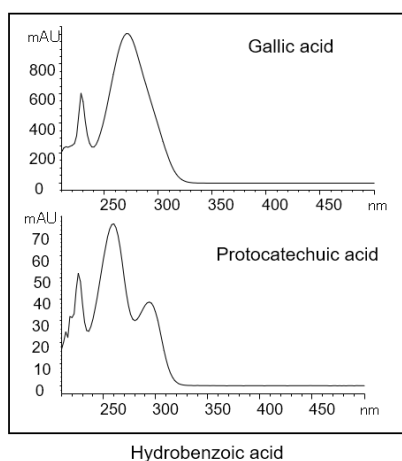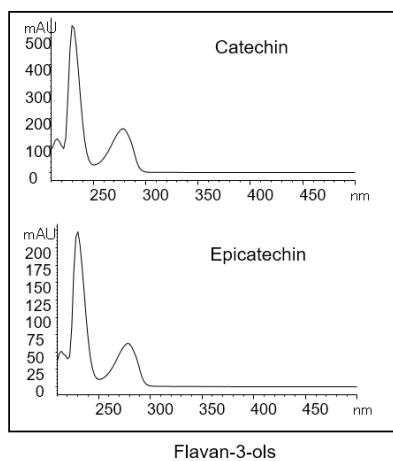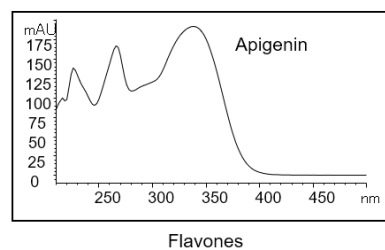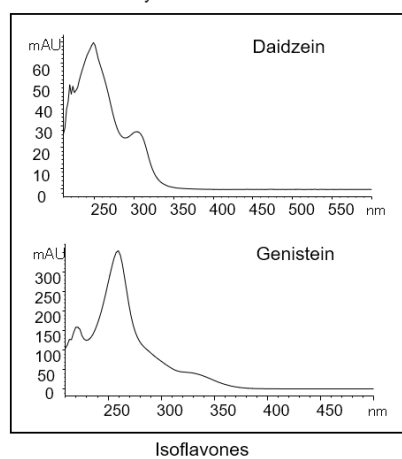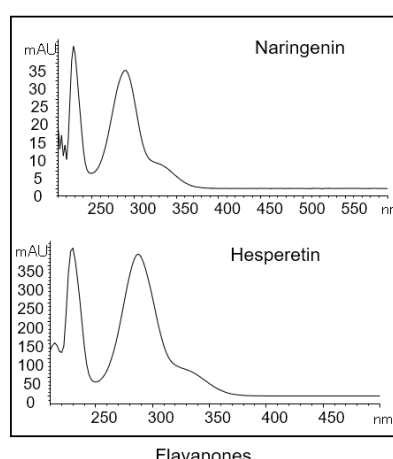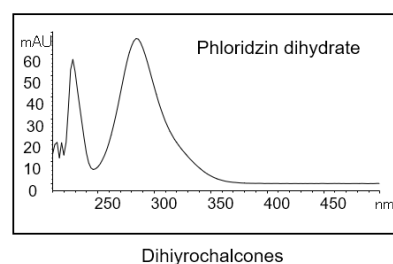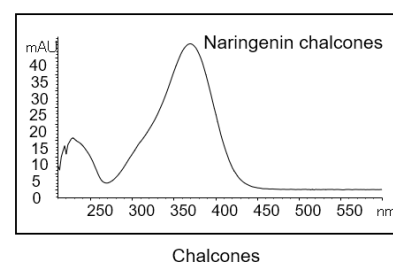

Supplement: s1 [file s1]
